# Supplementary material for: Ecological studies of COVID-19 and air pollution: How useful are they?
Source: PubMed Central journal article supplement — Environ Epidemiol. 2022 Feb 4;6(1):e195. doi: 10.1097/EE9.0000000000000195 (PMC8835551; doi:10.1097/ee9.0000000000000195), 2022-02-04

# Supplement: COVID-19 covariables

Mark Godtberg

Dec 14, 2021

Negative binomial models for covariables for cumulative deaths from COVID-19 until the end of April 2021 across all counties in the continental USA

An offset is included of the natural logarithm of the county-specific population

Plots displayed are marginal fitted functions for each covariable fitted as a natural cubic spline function on 3 degrees of freedom

Univariate covariates - Neg binom Covid-19 death counts (3 df) until April 2021

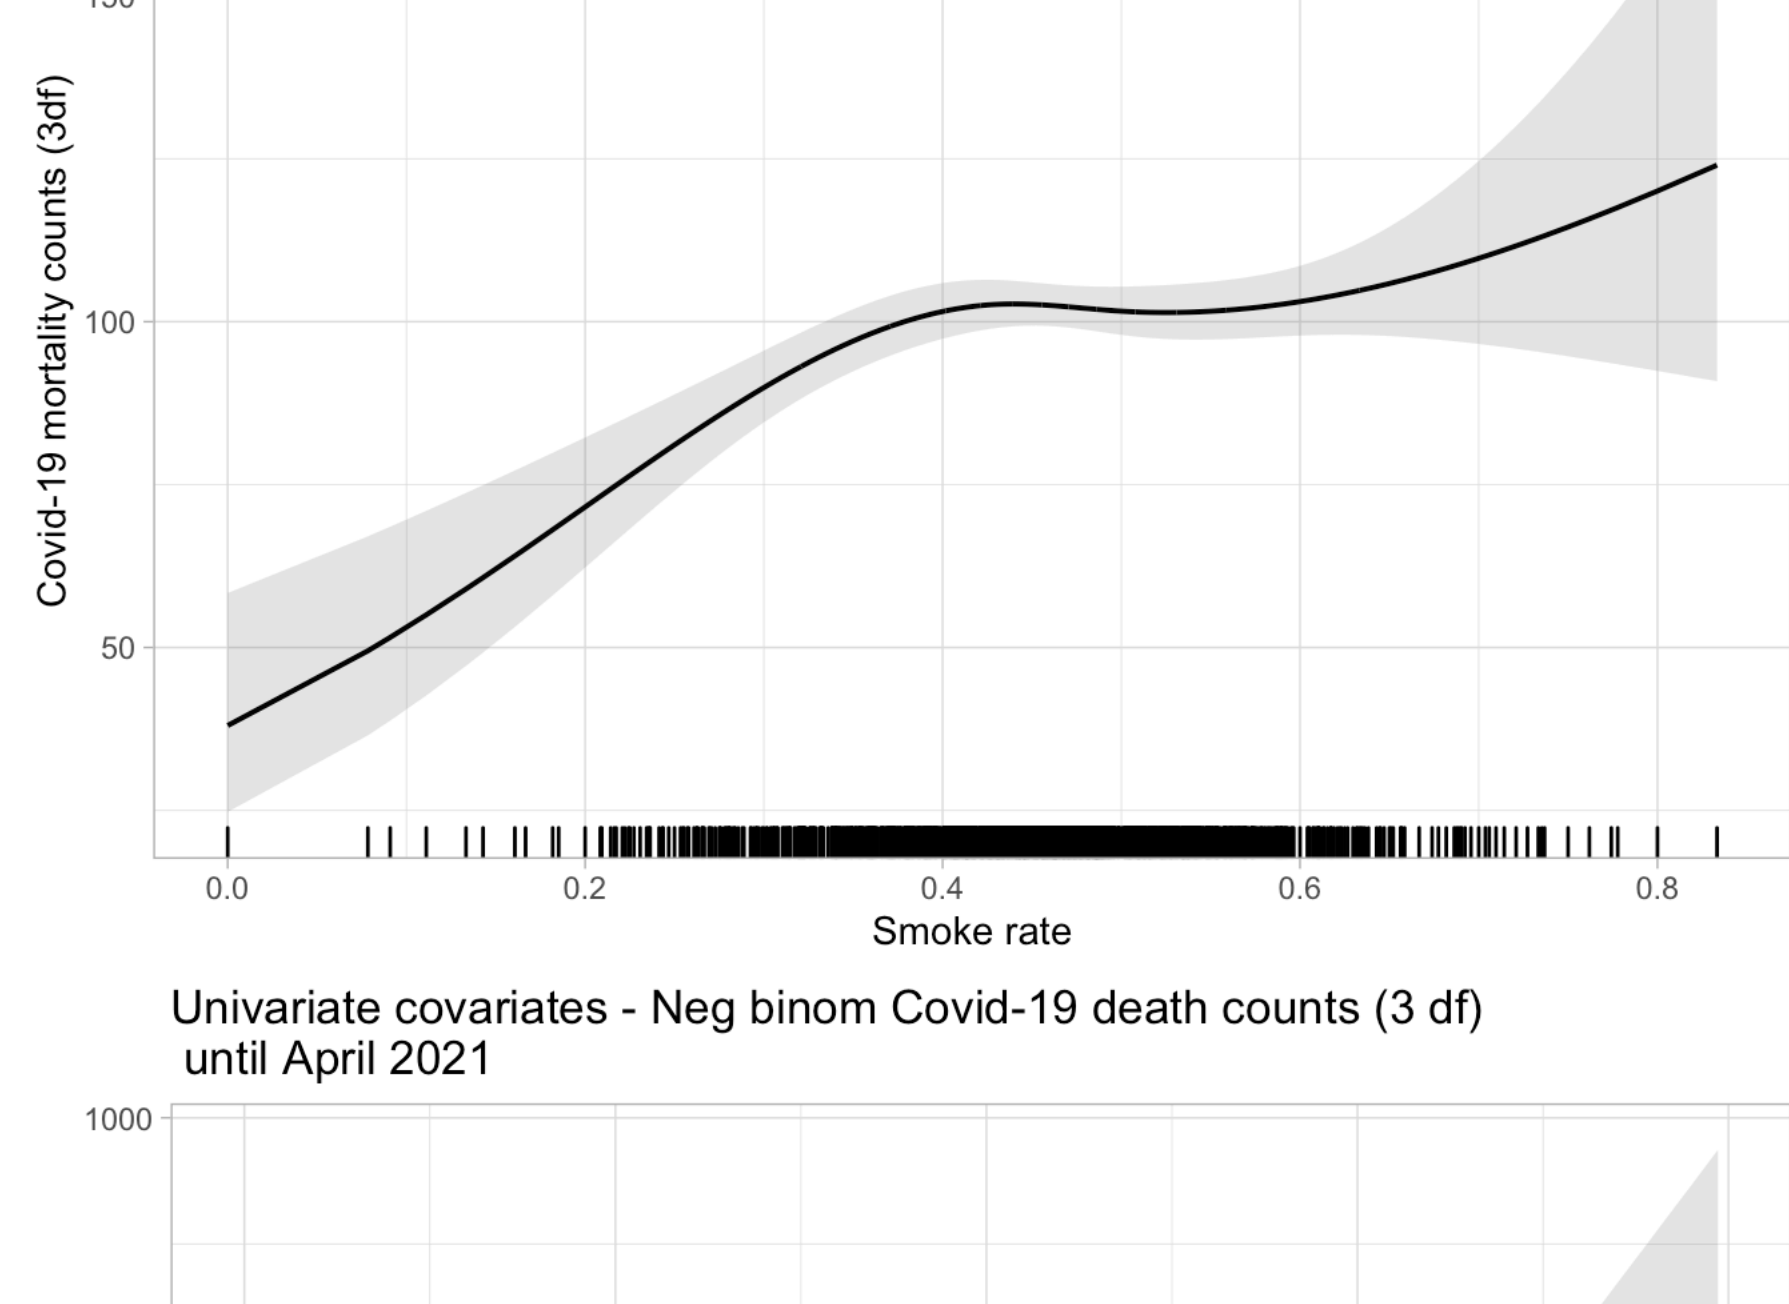

Univariate covariates - Neg binom Covid-19 death counts (3 df) until April 2021

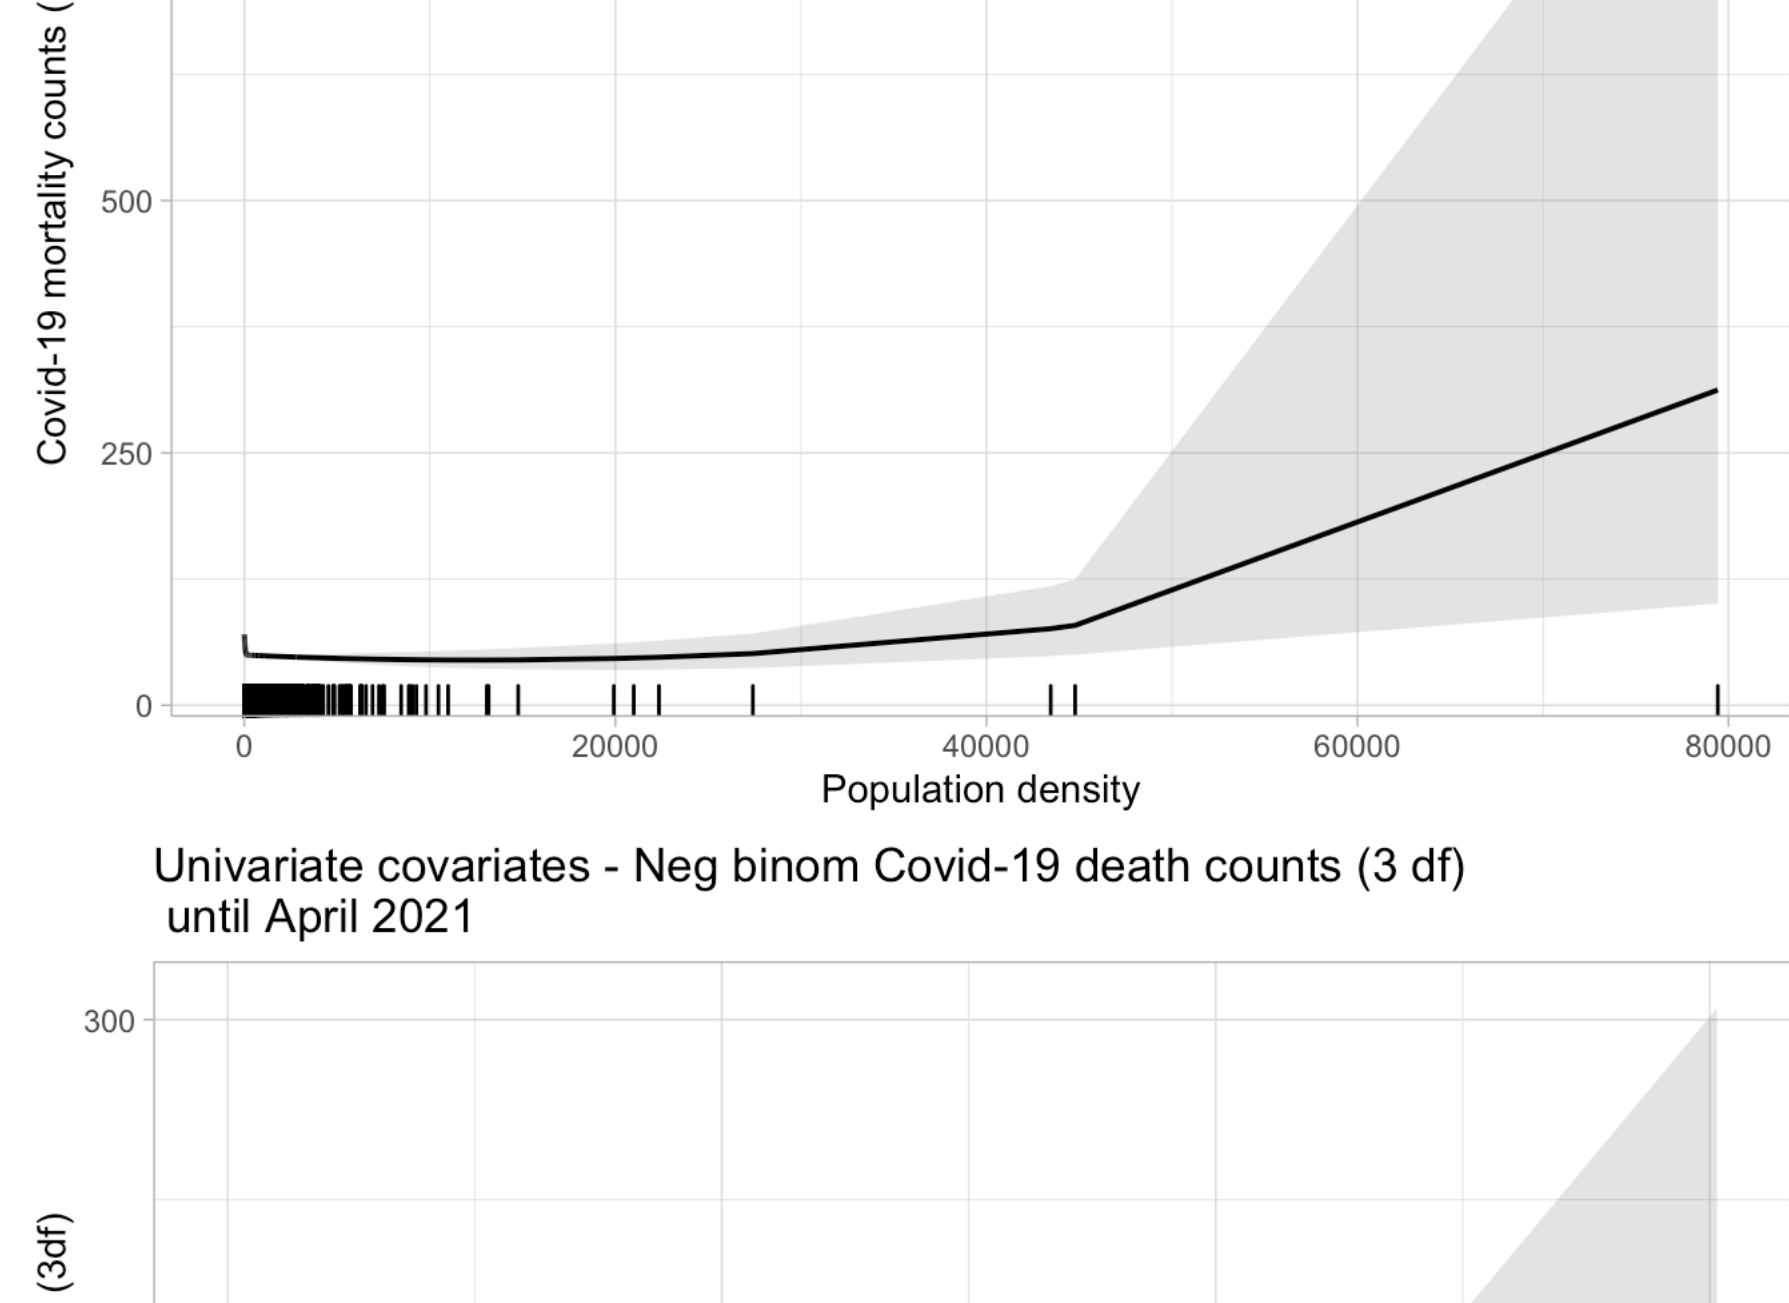

Univariate covariates - Neg binom Covid-19 death counts (3 df) until April 2021

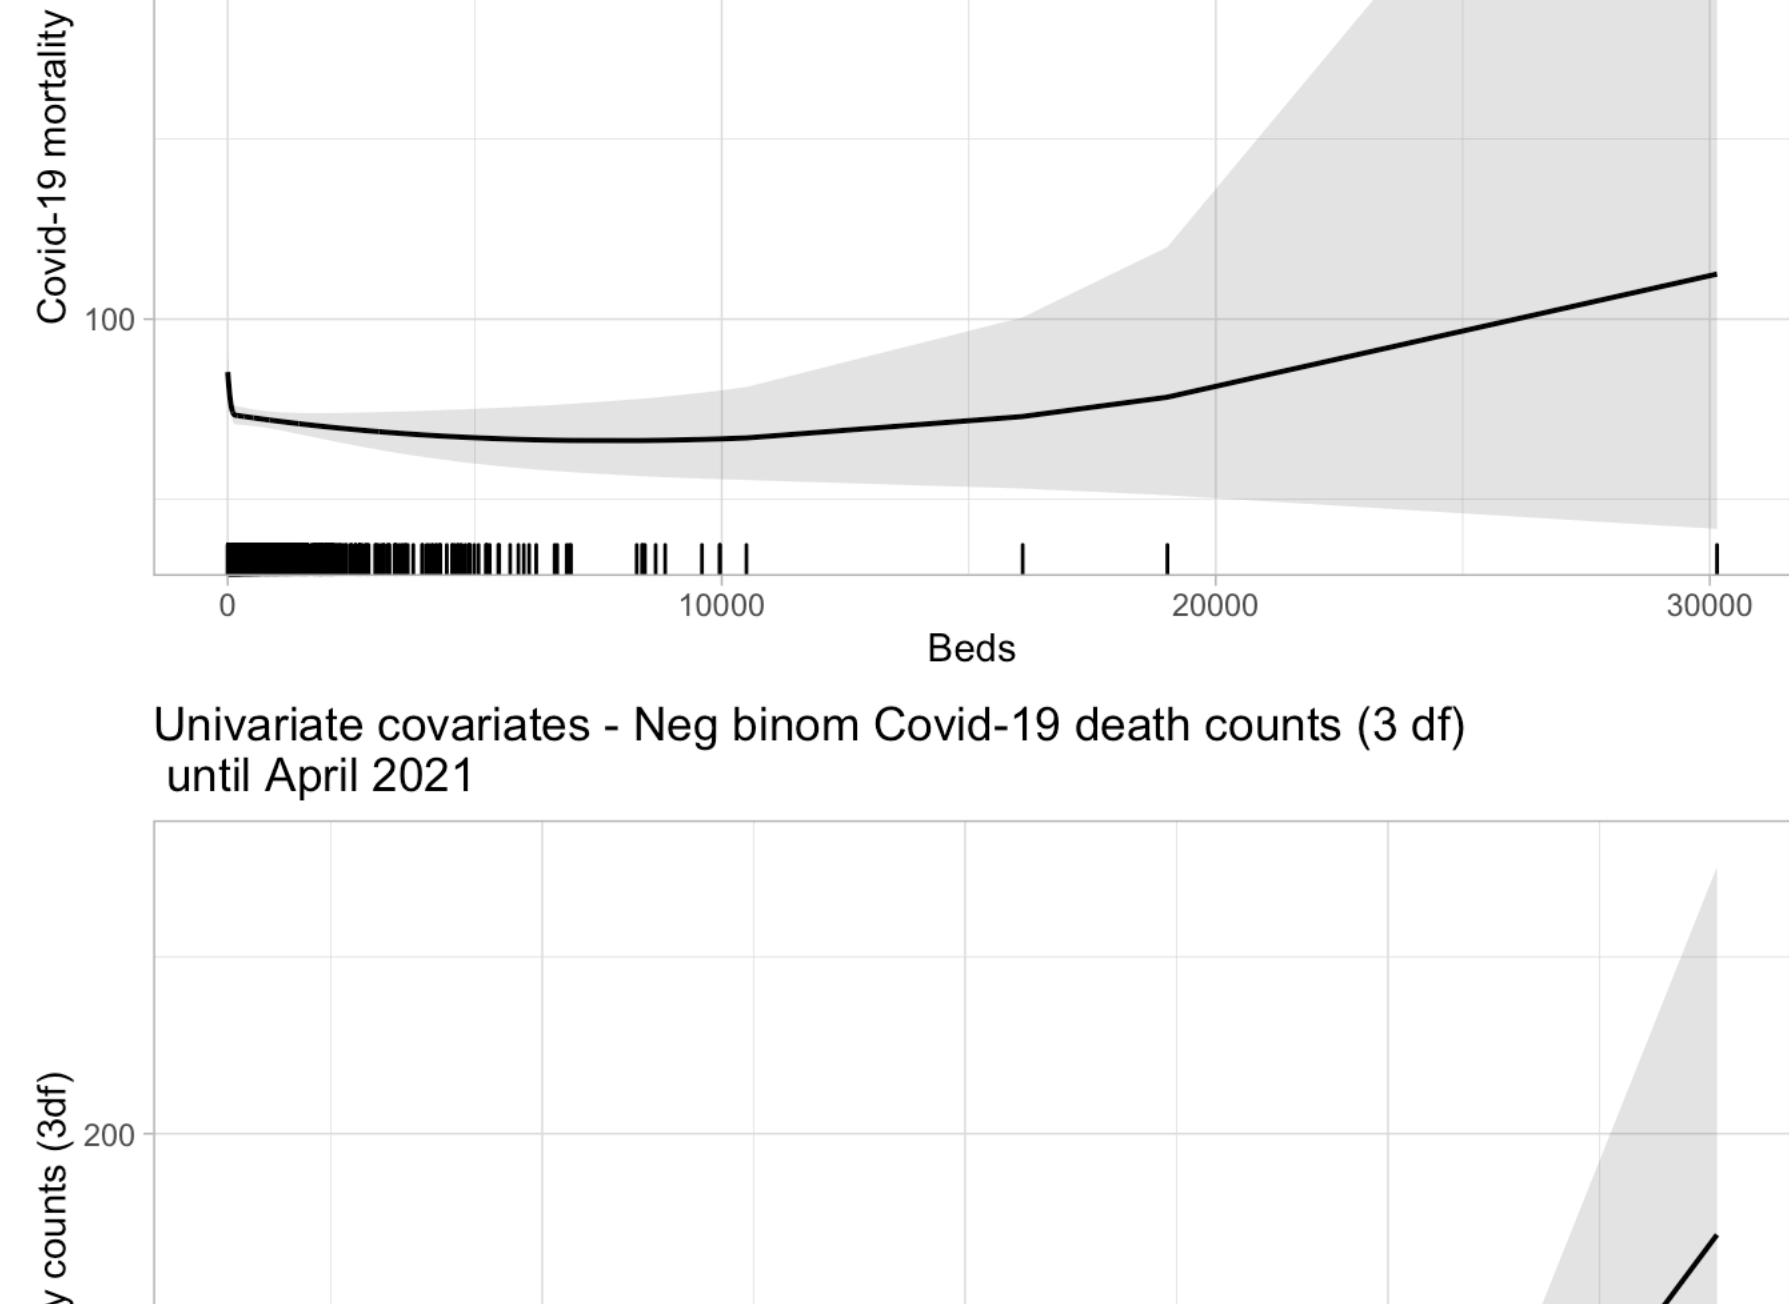

Univariate covariates - Neg binom Covid-19 death counts (3 df) until April 2021

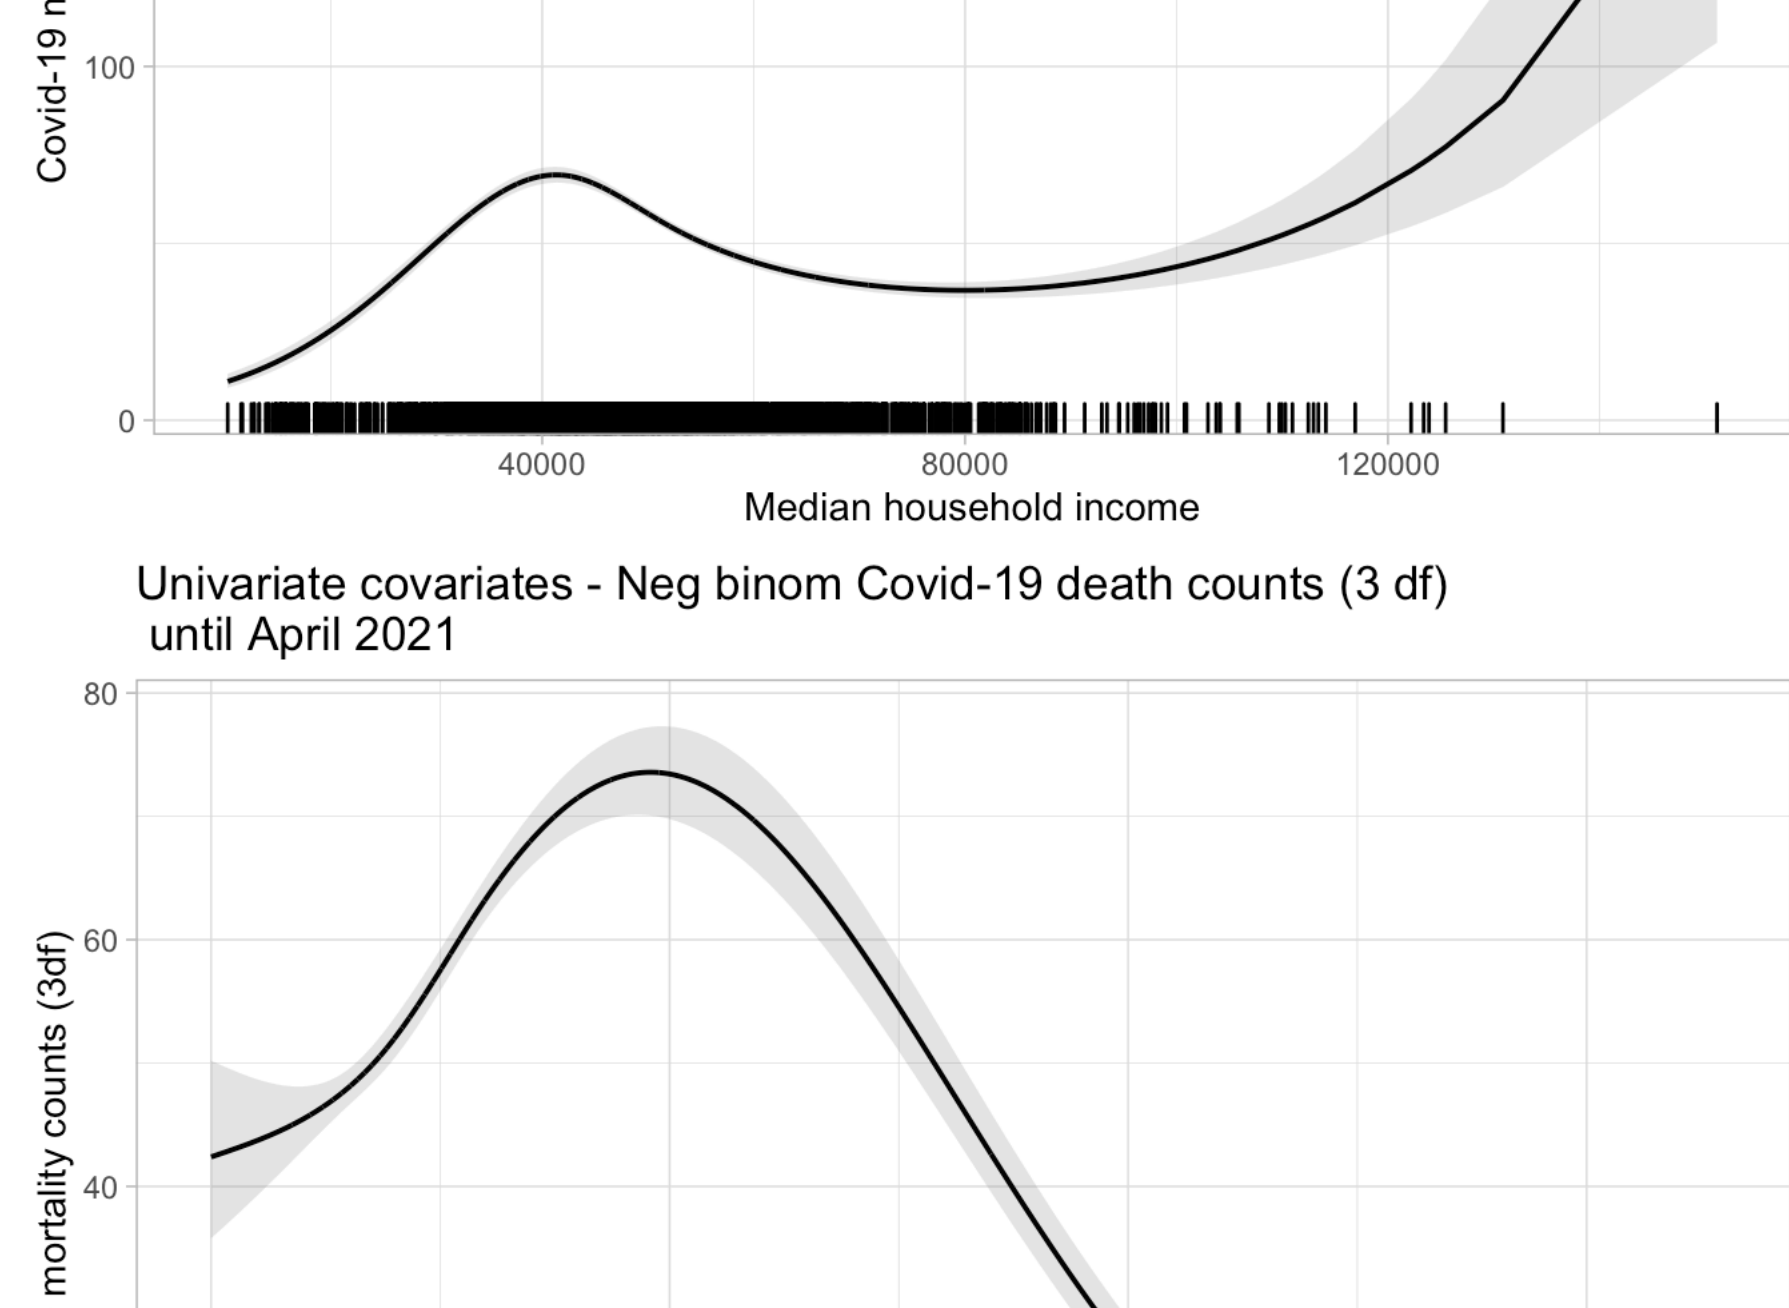

Univariate covariates - Neg binom Covid-19 death counts (3 df) until April 2021

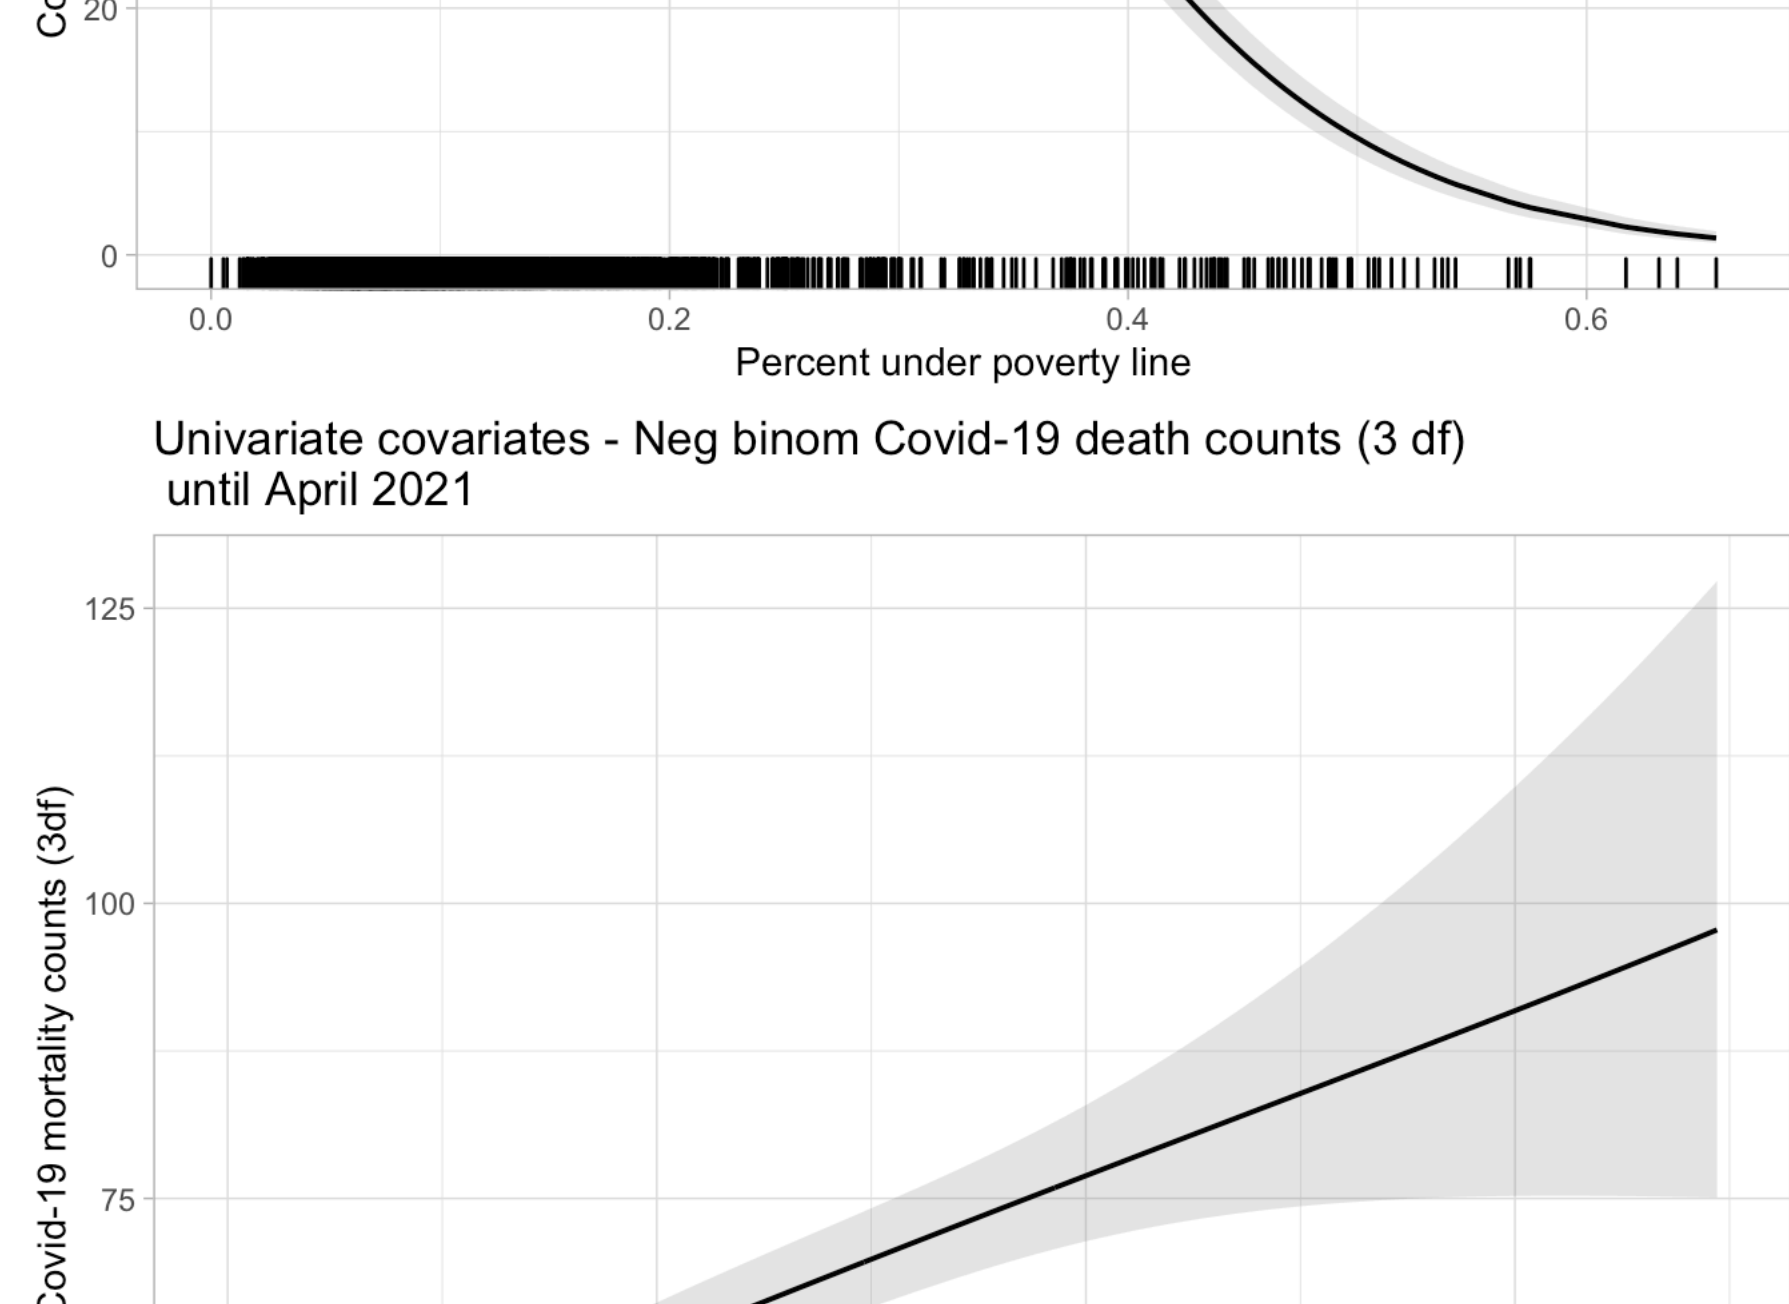

Univariate covariates - Neg binom Covid-19 death counts (3 df) until April 2021

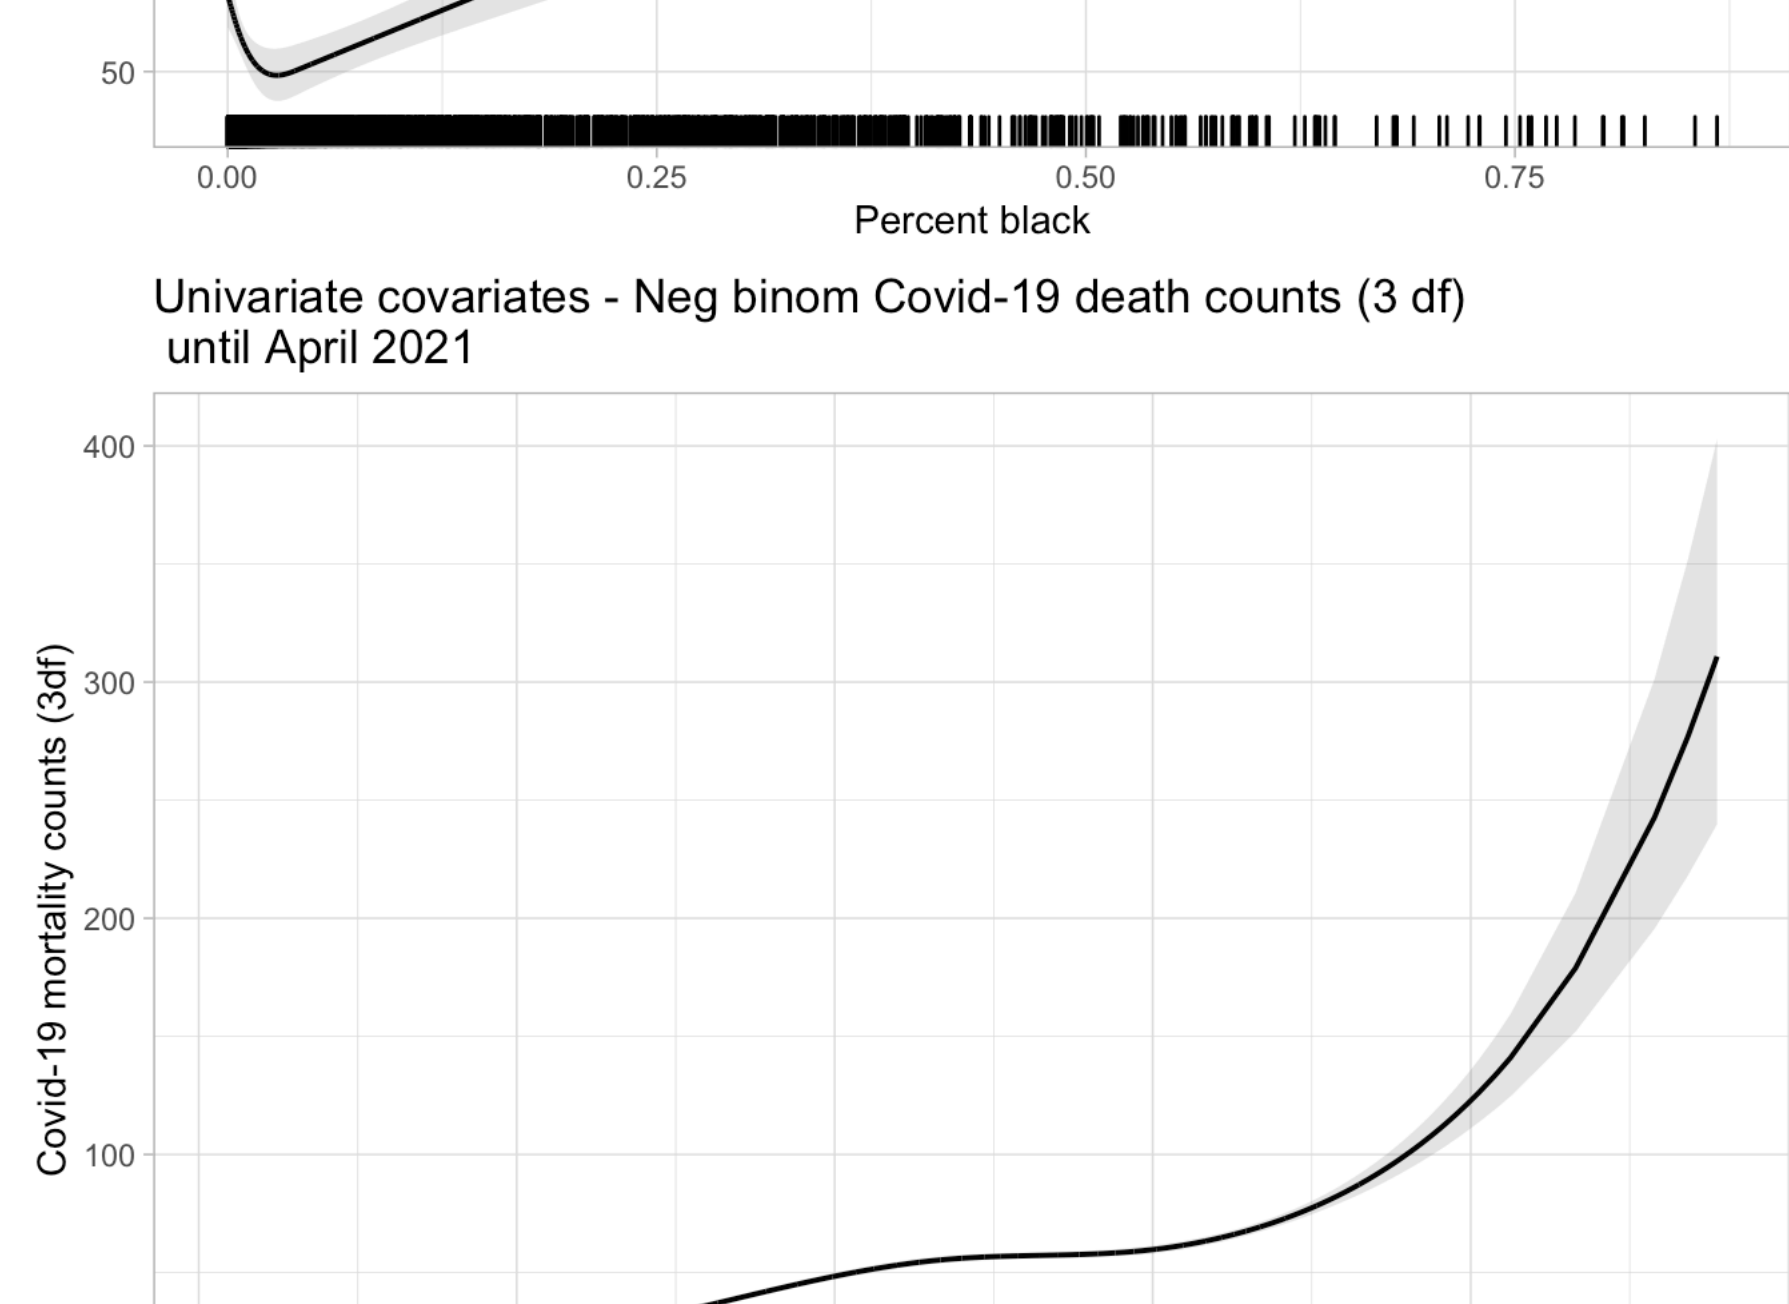

Univariate covariates - Neg binom Covid-19 death counts (3 df) until April 2021

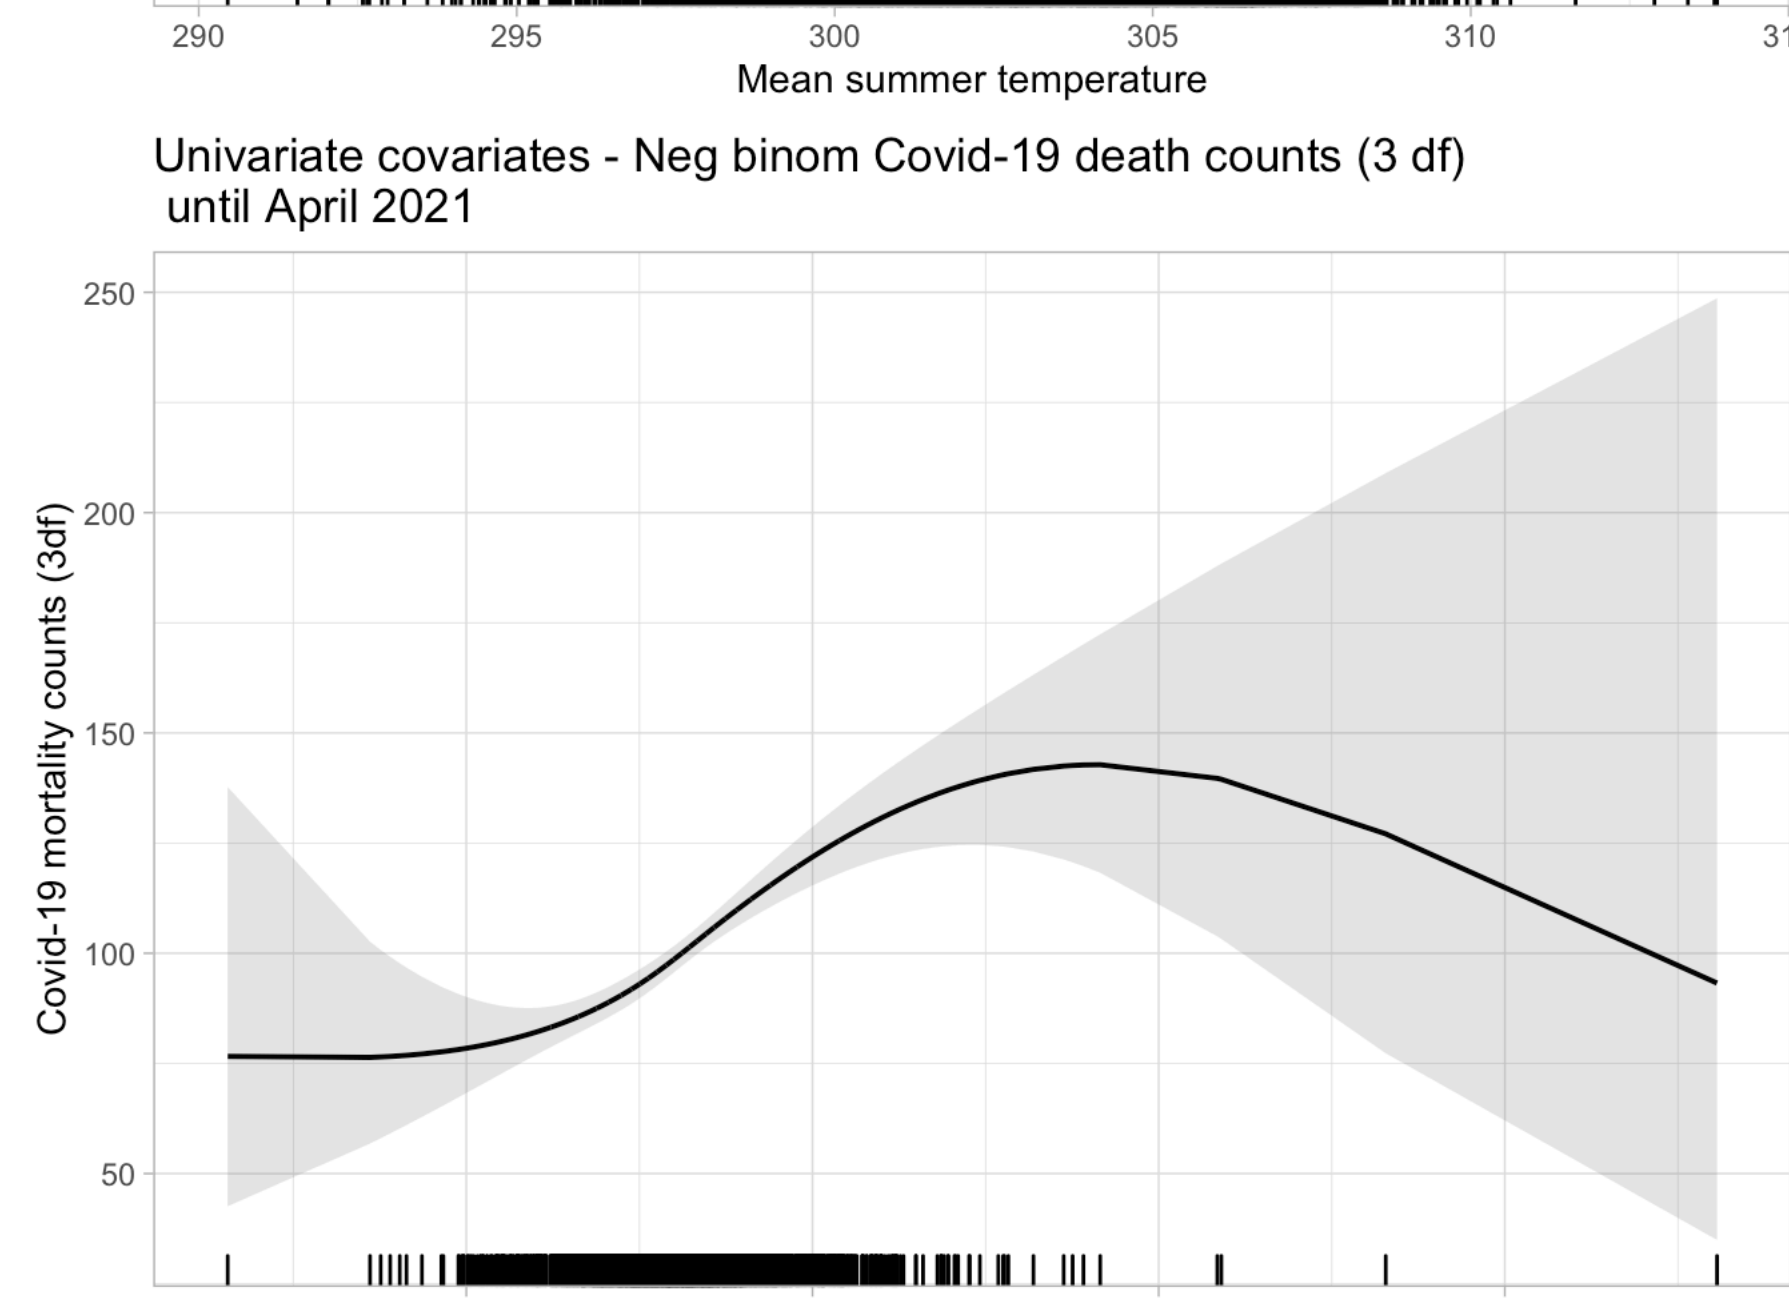

Univariate covariates - Neg binom Covid-19 death counts (3 df) until April 2021

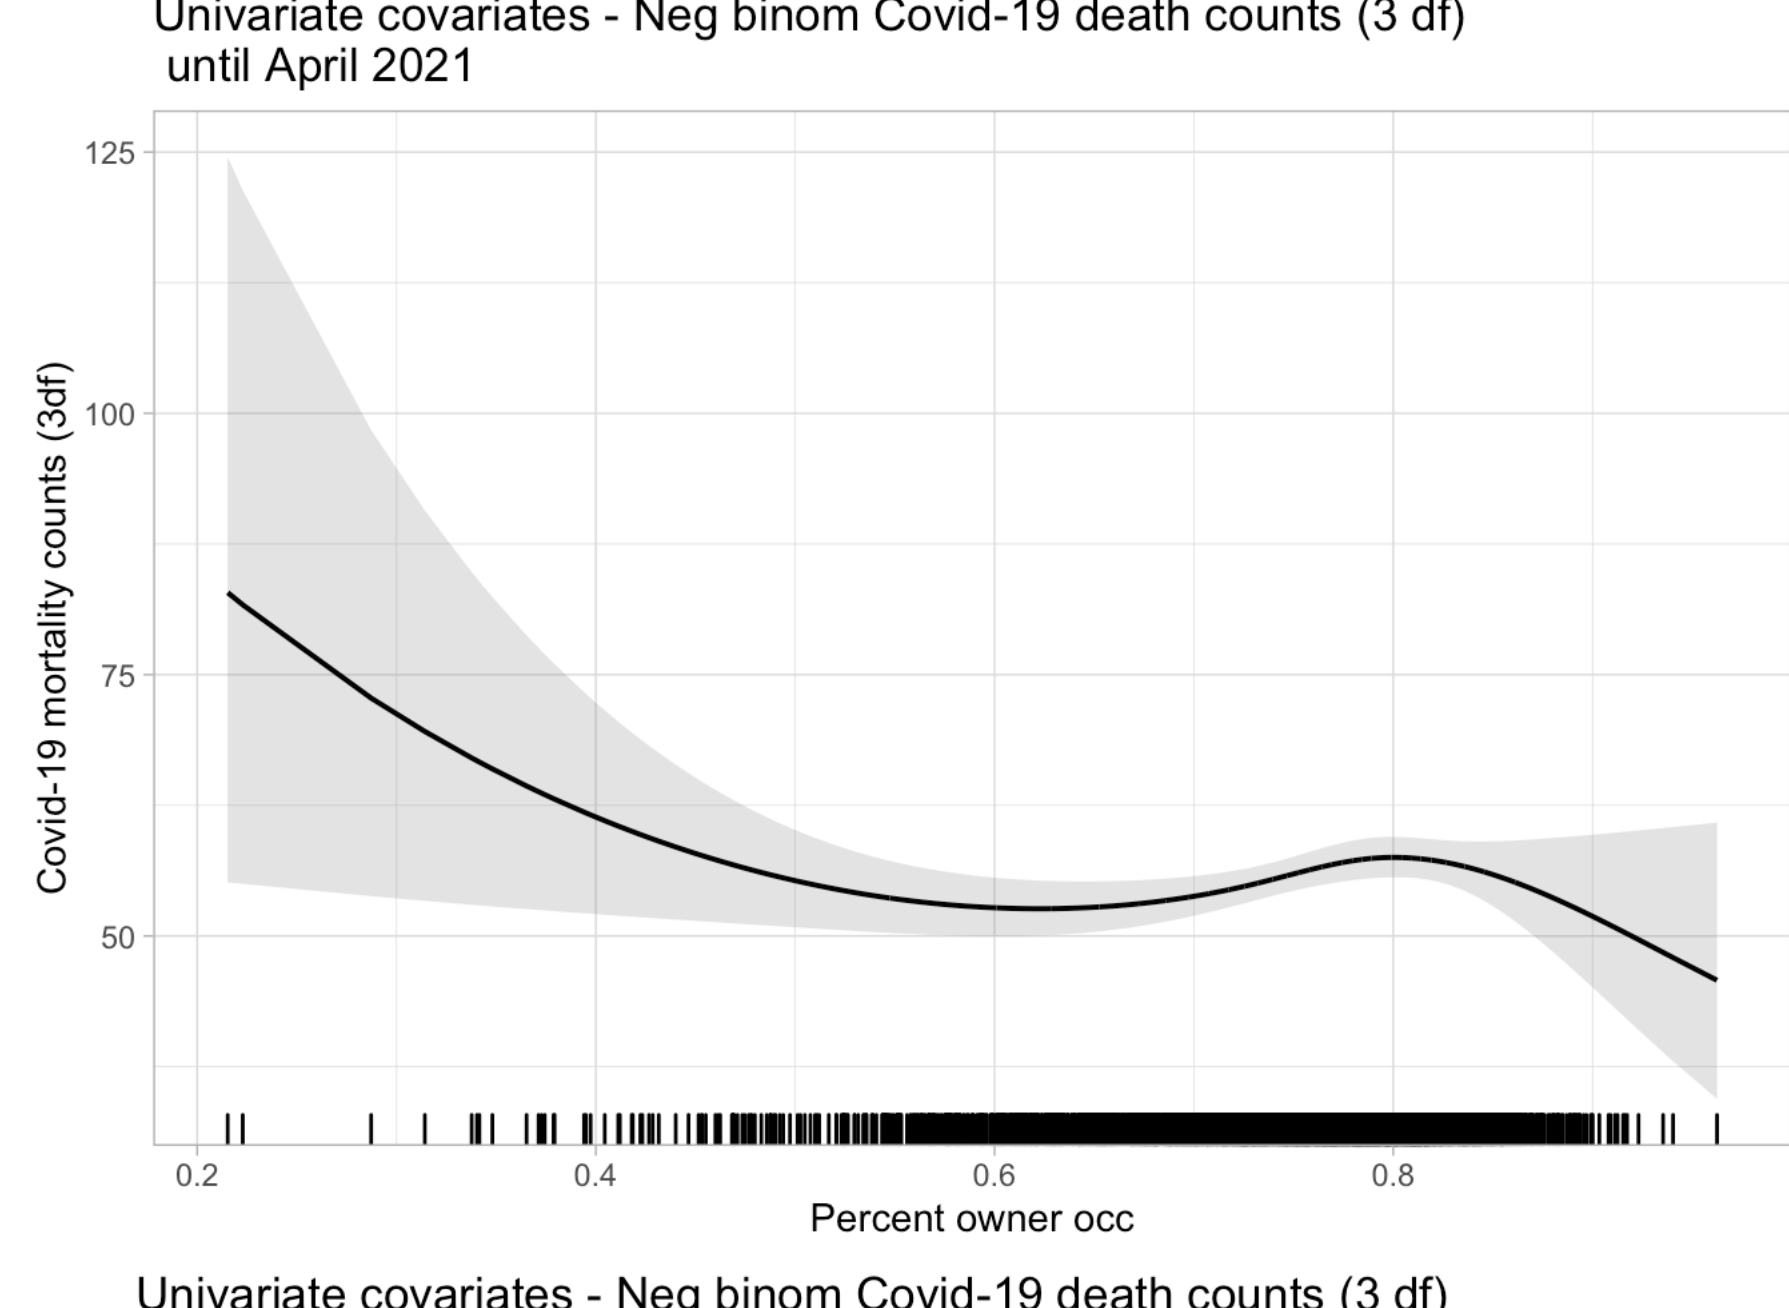

Univariate covariates - Neg binom Covid-19 death counts (3 df) until April 2021

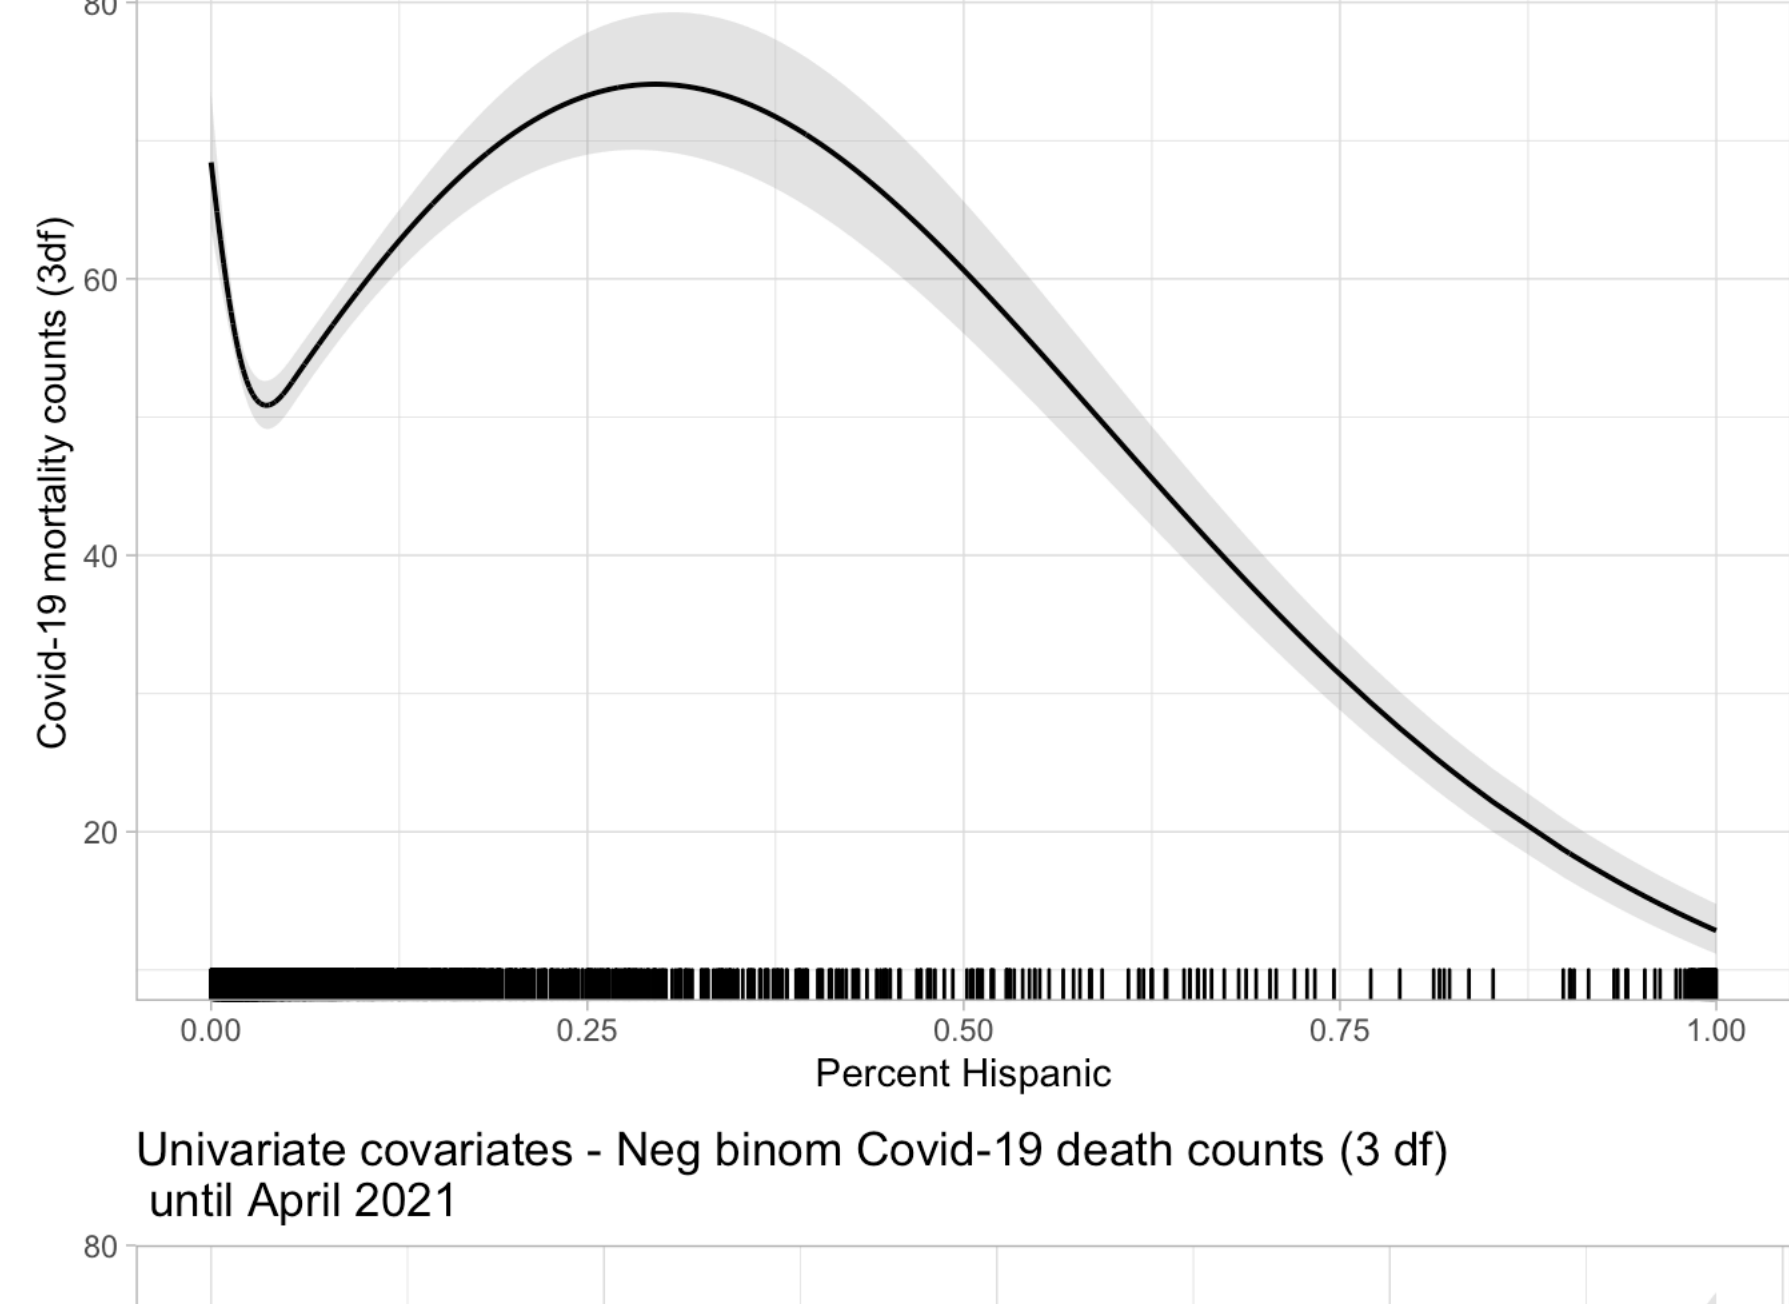

Univariate covariates - Neg binom Covid-19 death counts (3 df) until April 2021

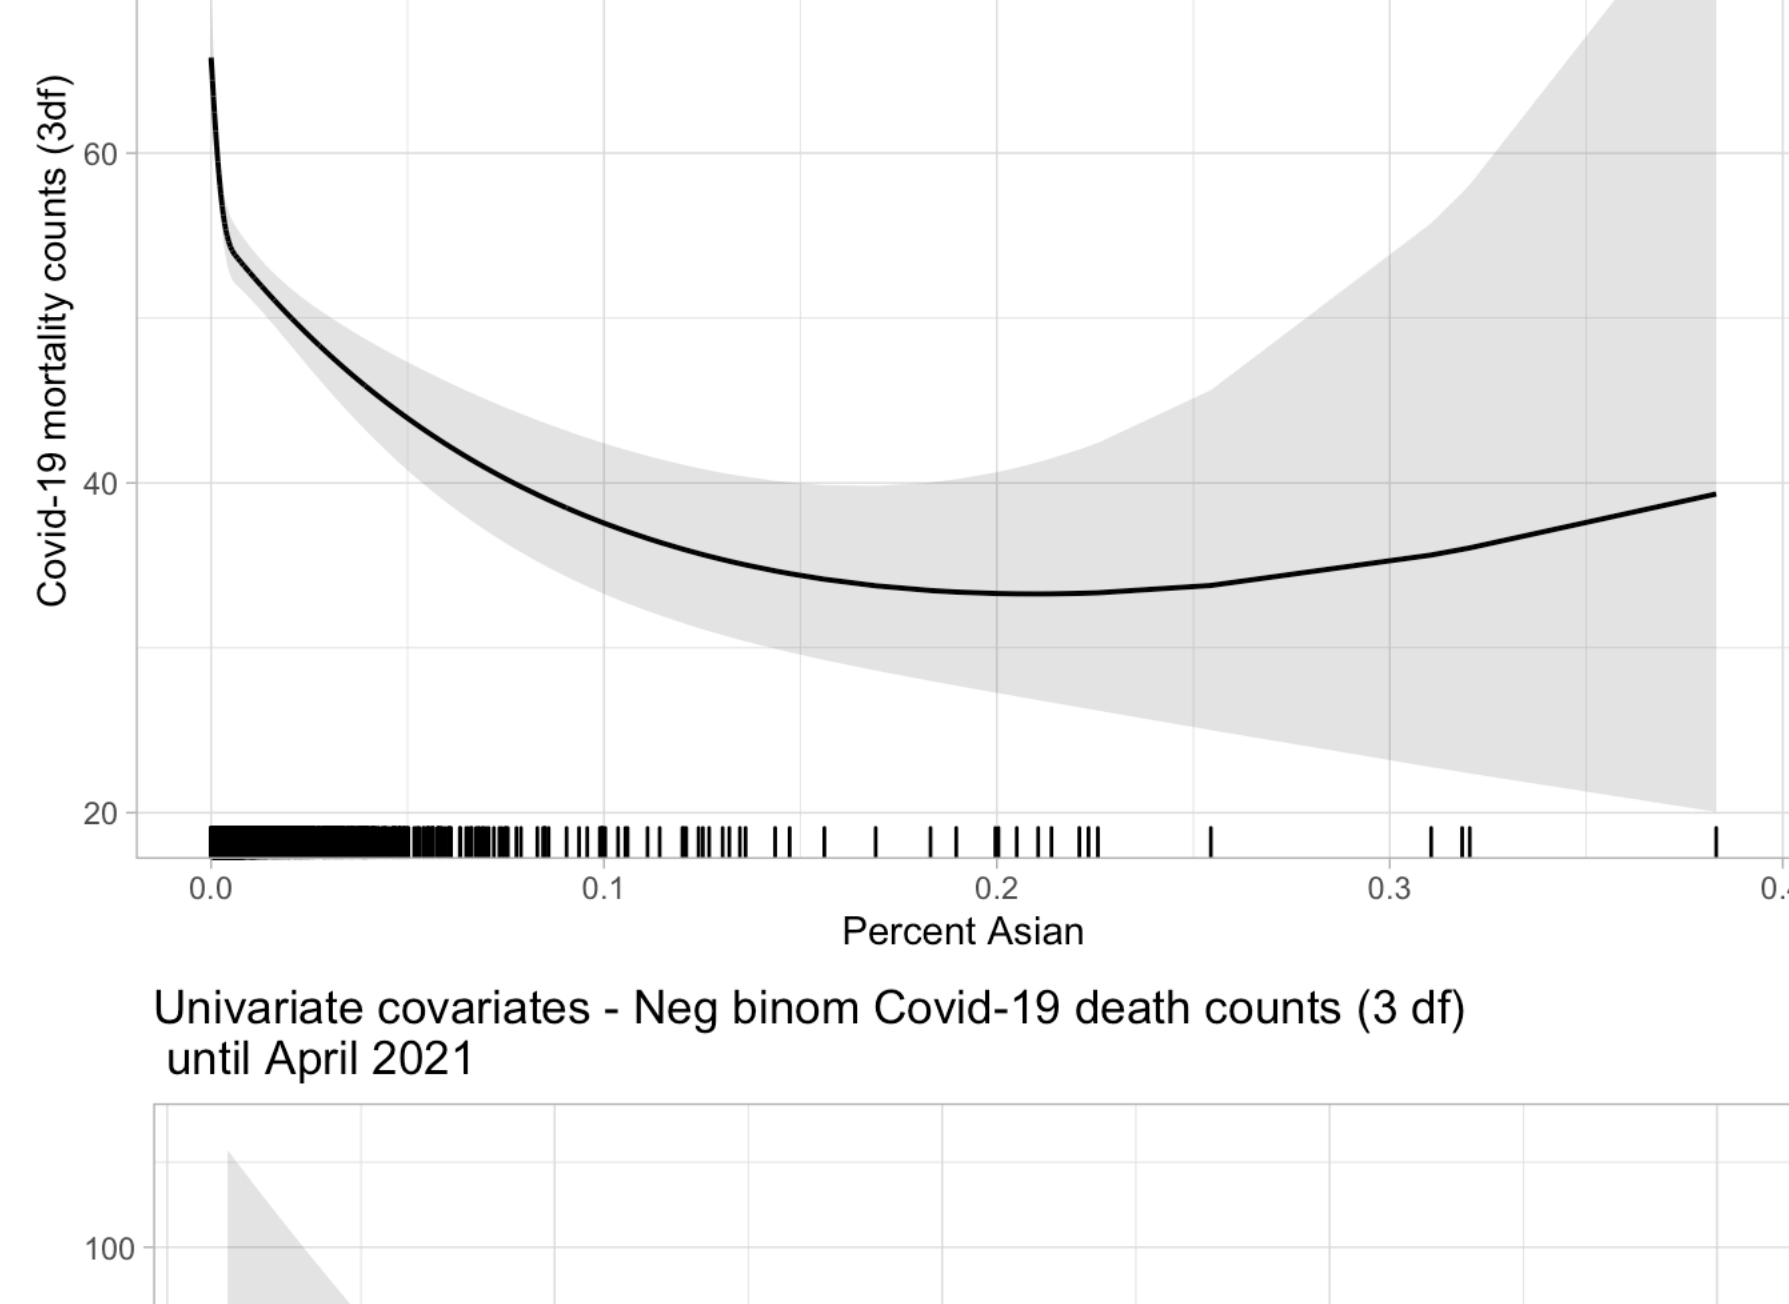

Univariate covariates - Neg binom Covid-19 death counts (3 df) until April 2021

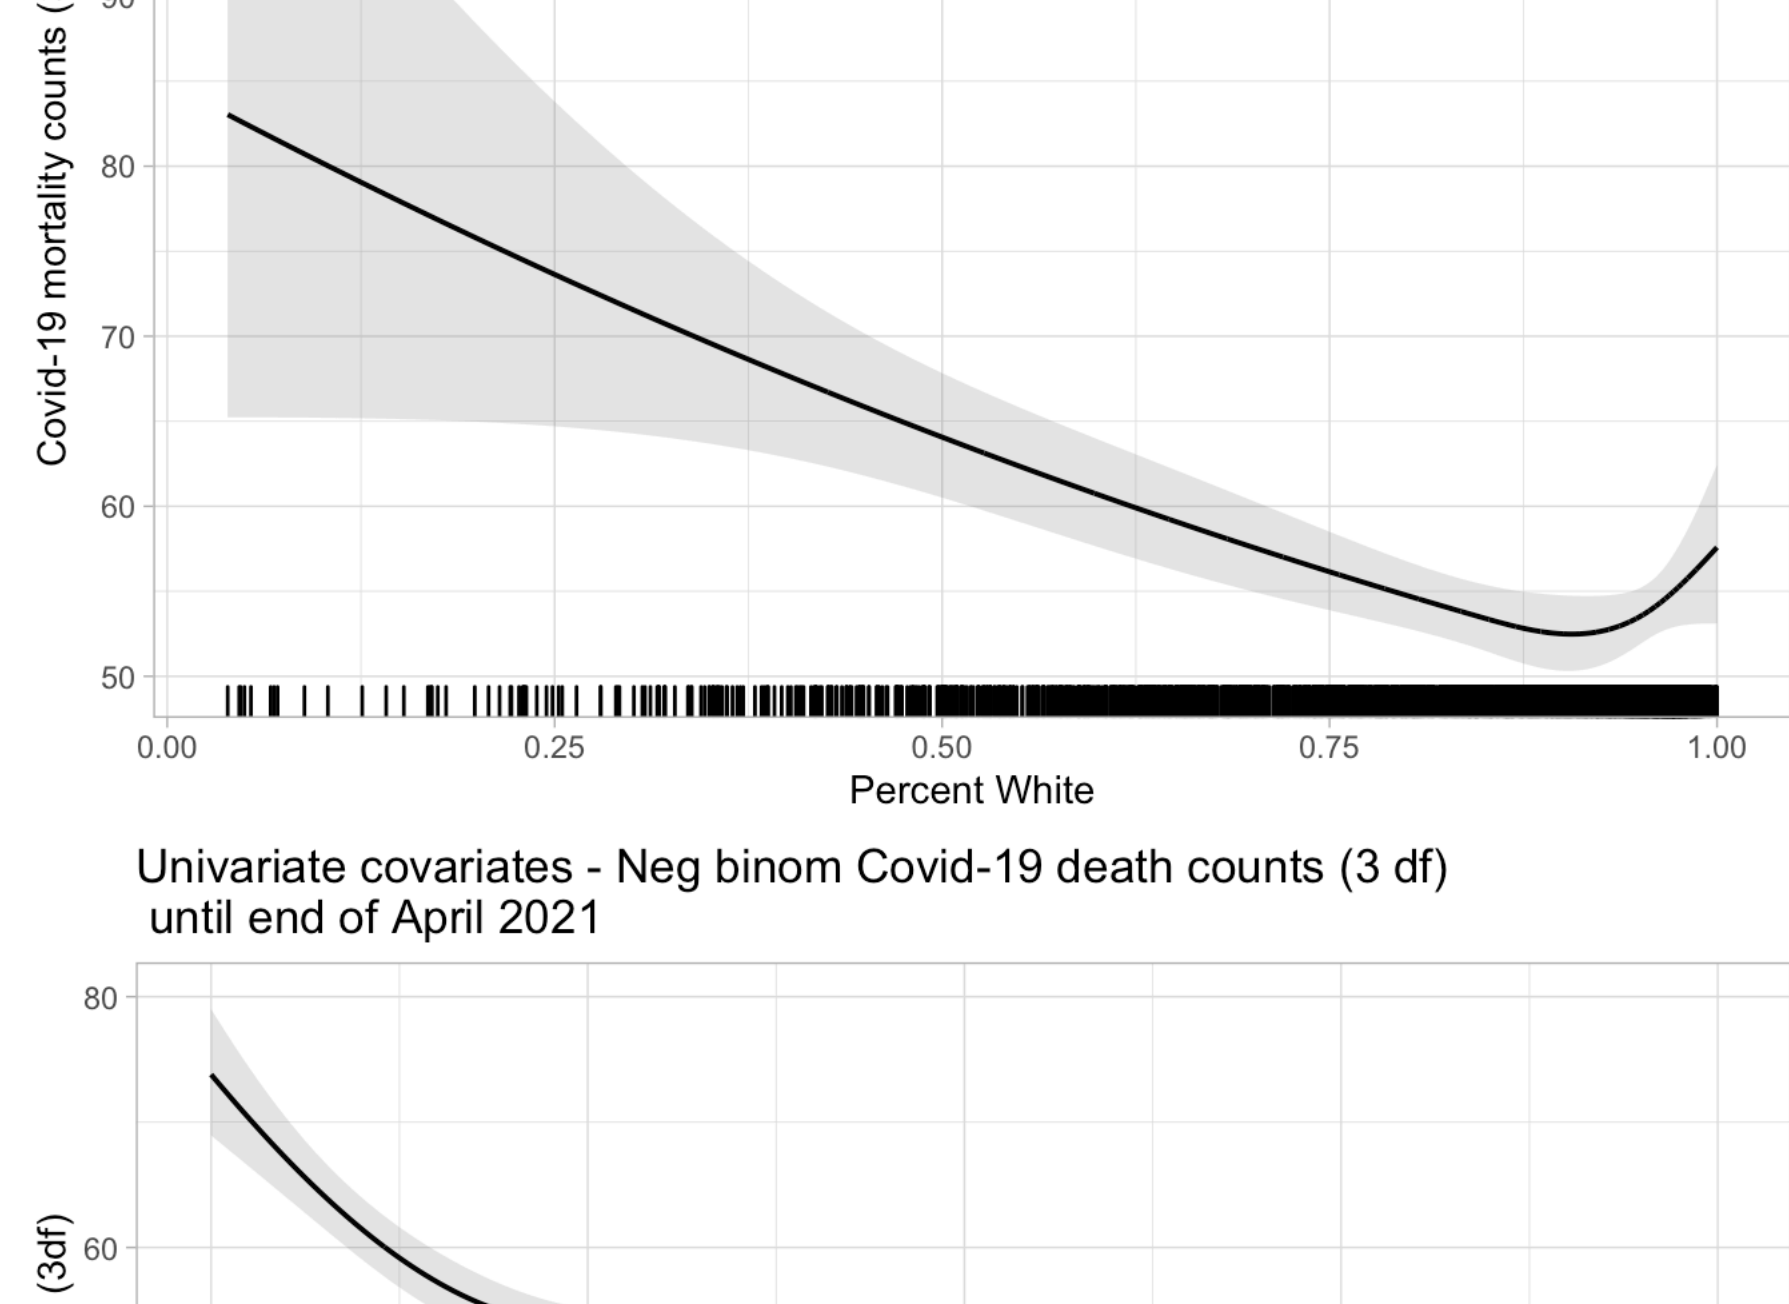

Univariate covariates - Neg binom Covid-19 death counts (3 df) until April 2021

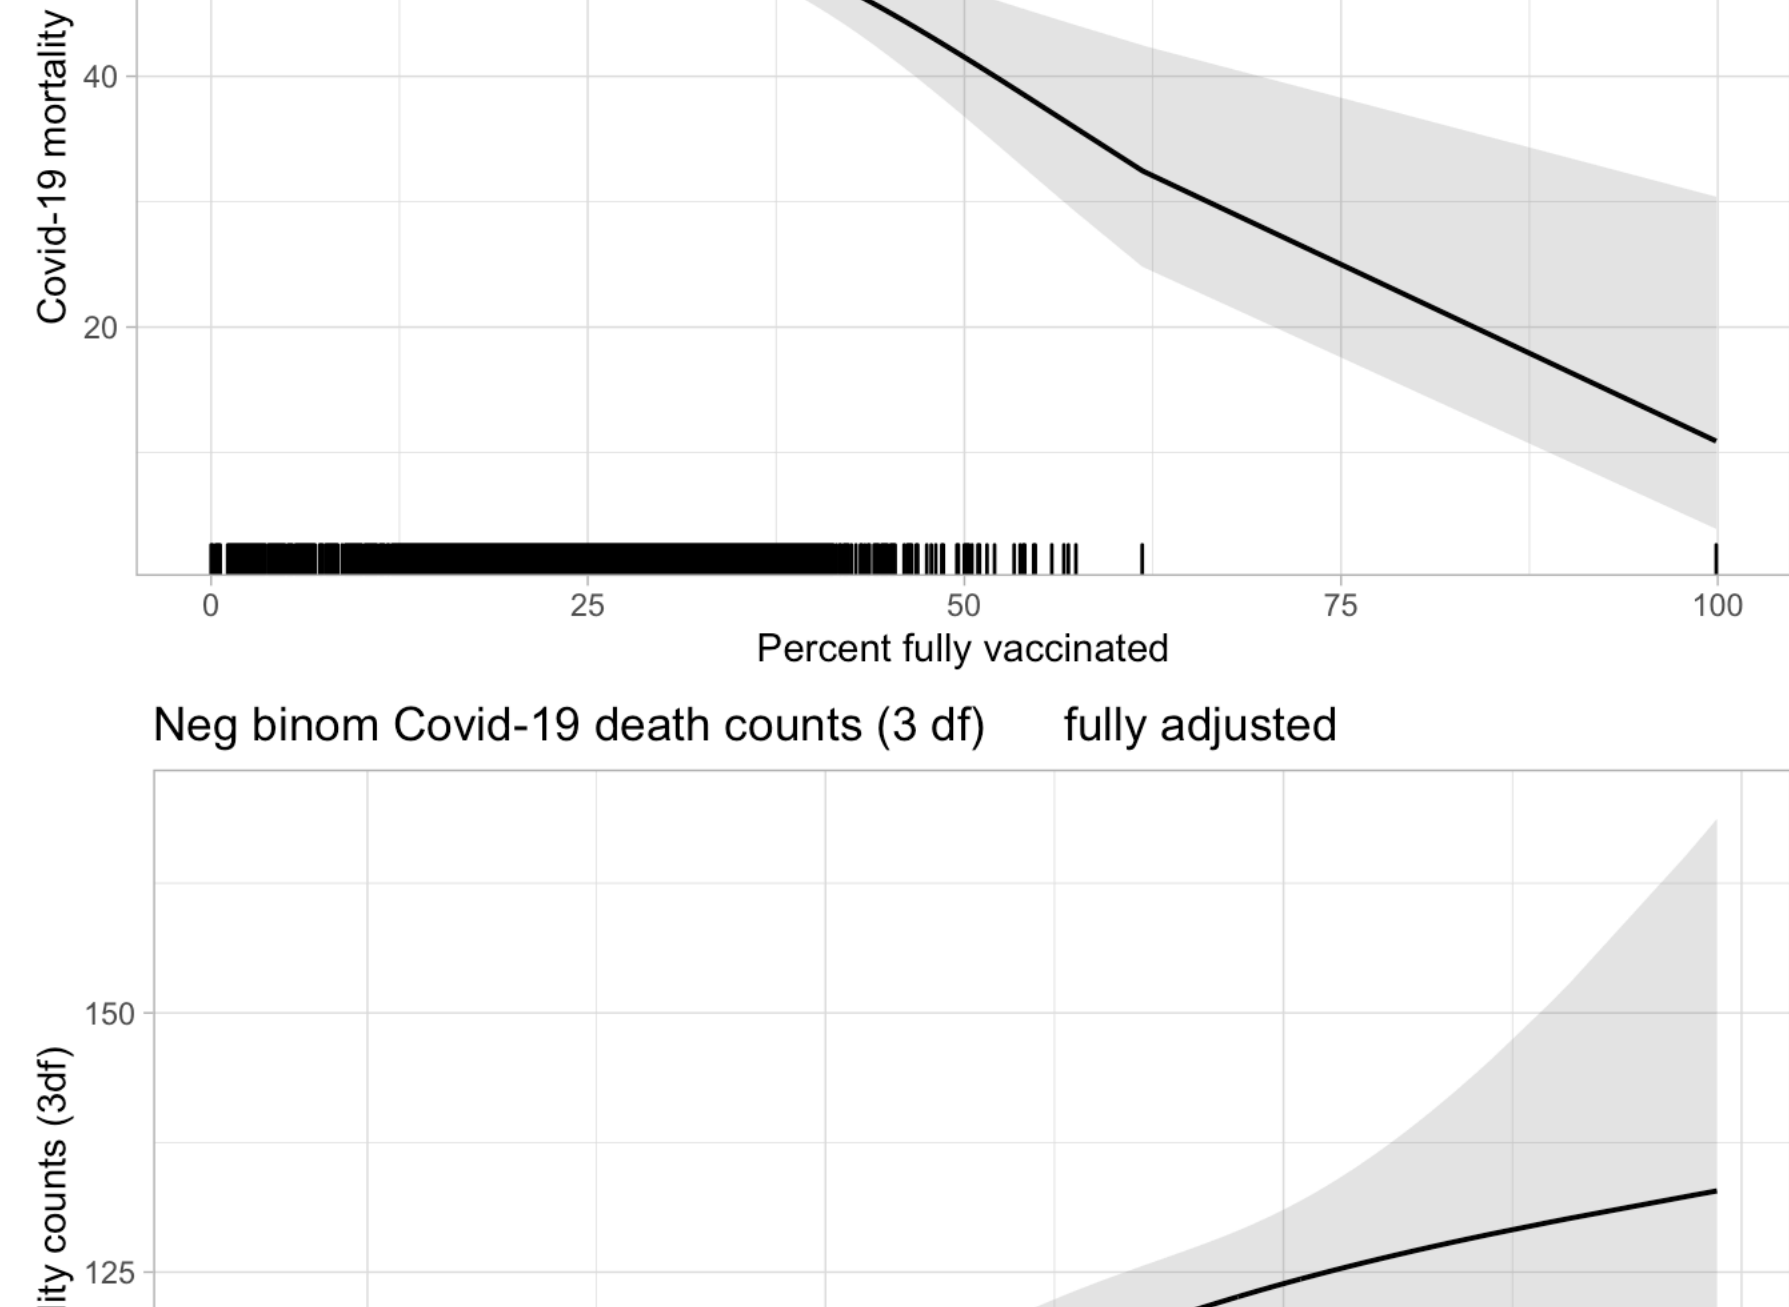

Univariate covariates - Neg binom Covid-19 death counts (3 df) until end of April 2021

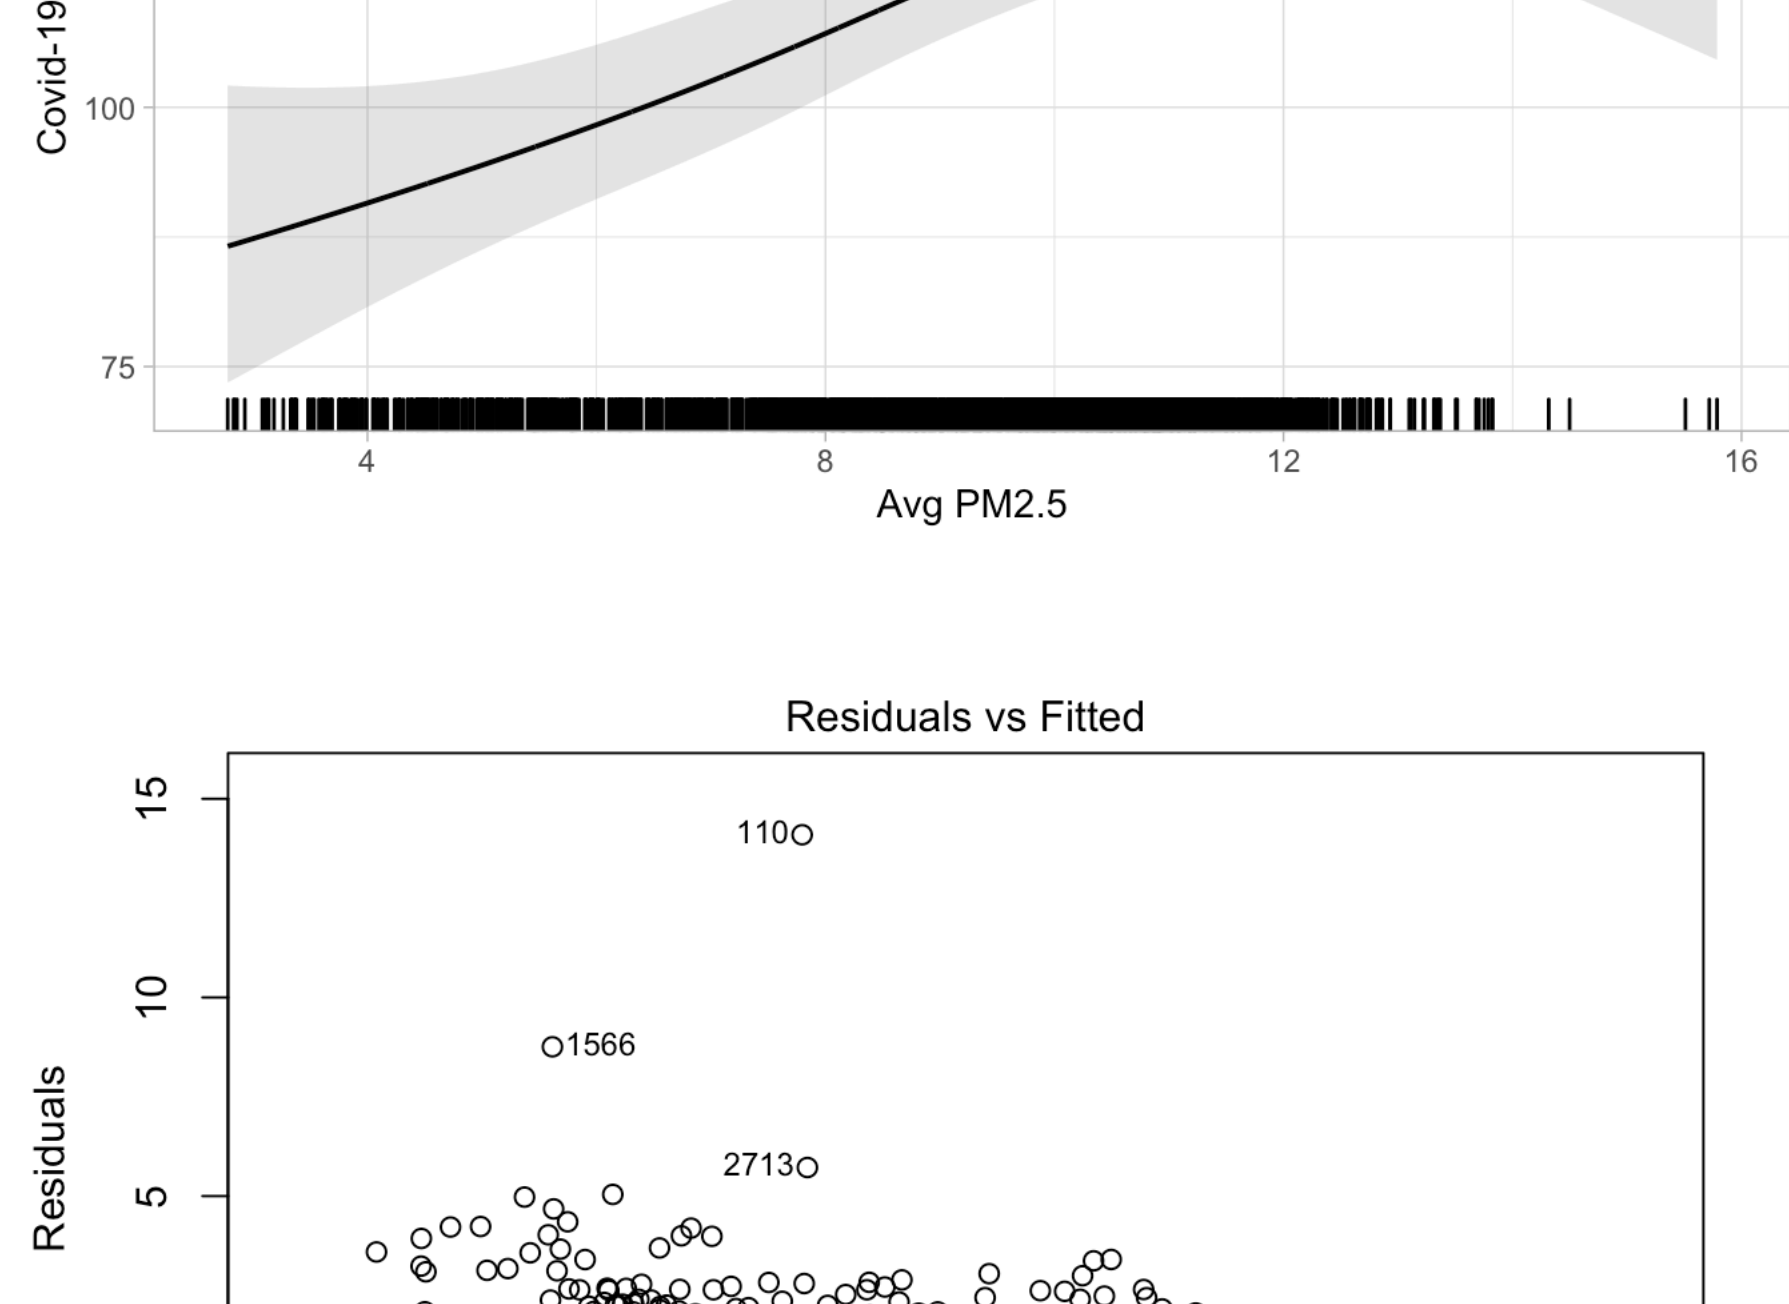

Neg binom Covid-19 death counts (3 df) fully adjusted

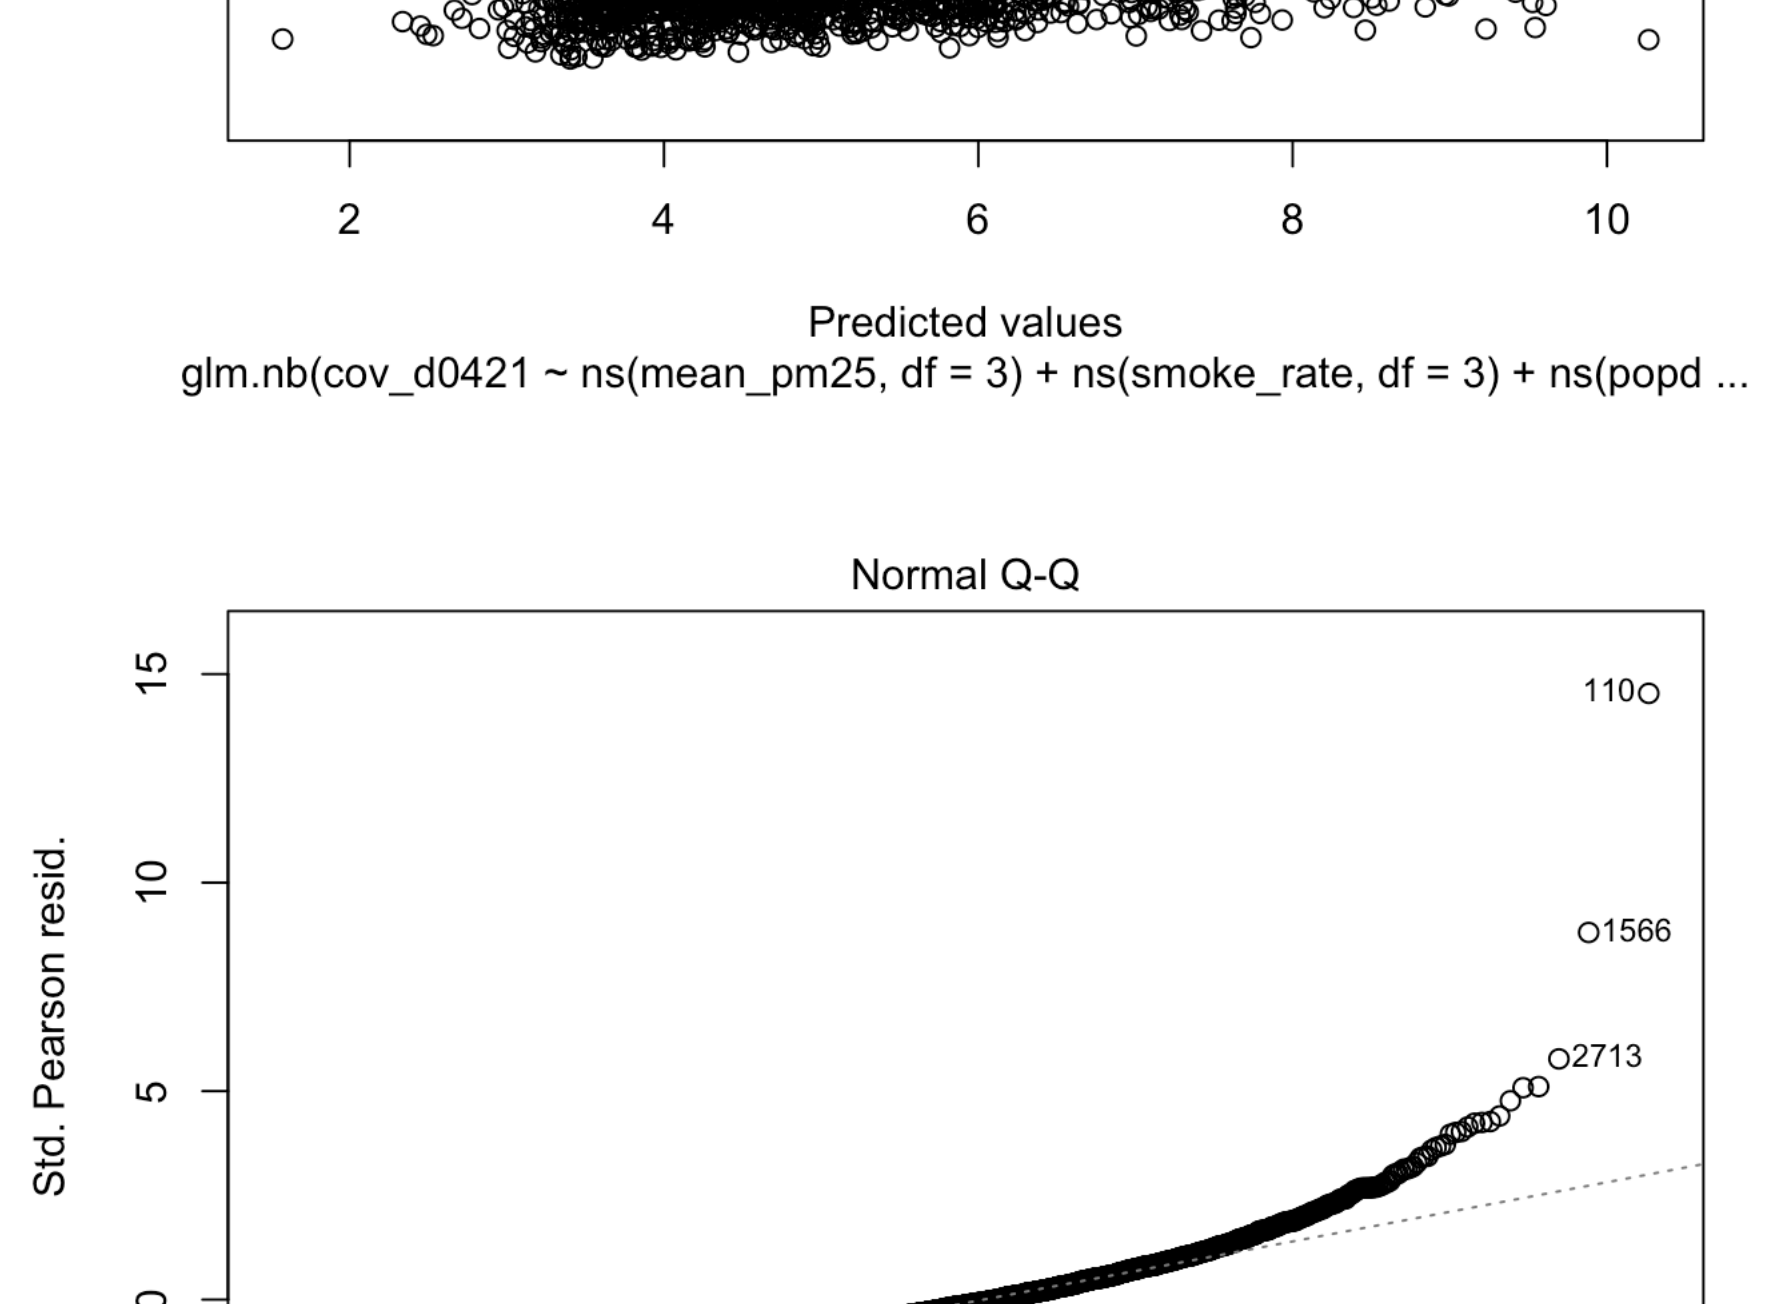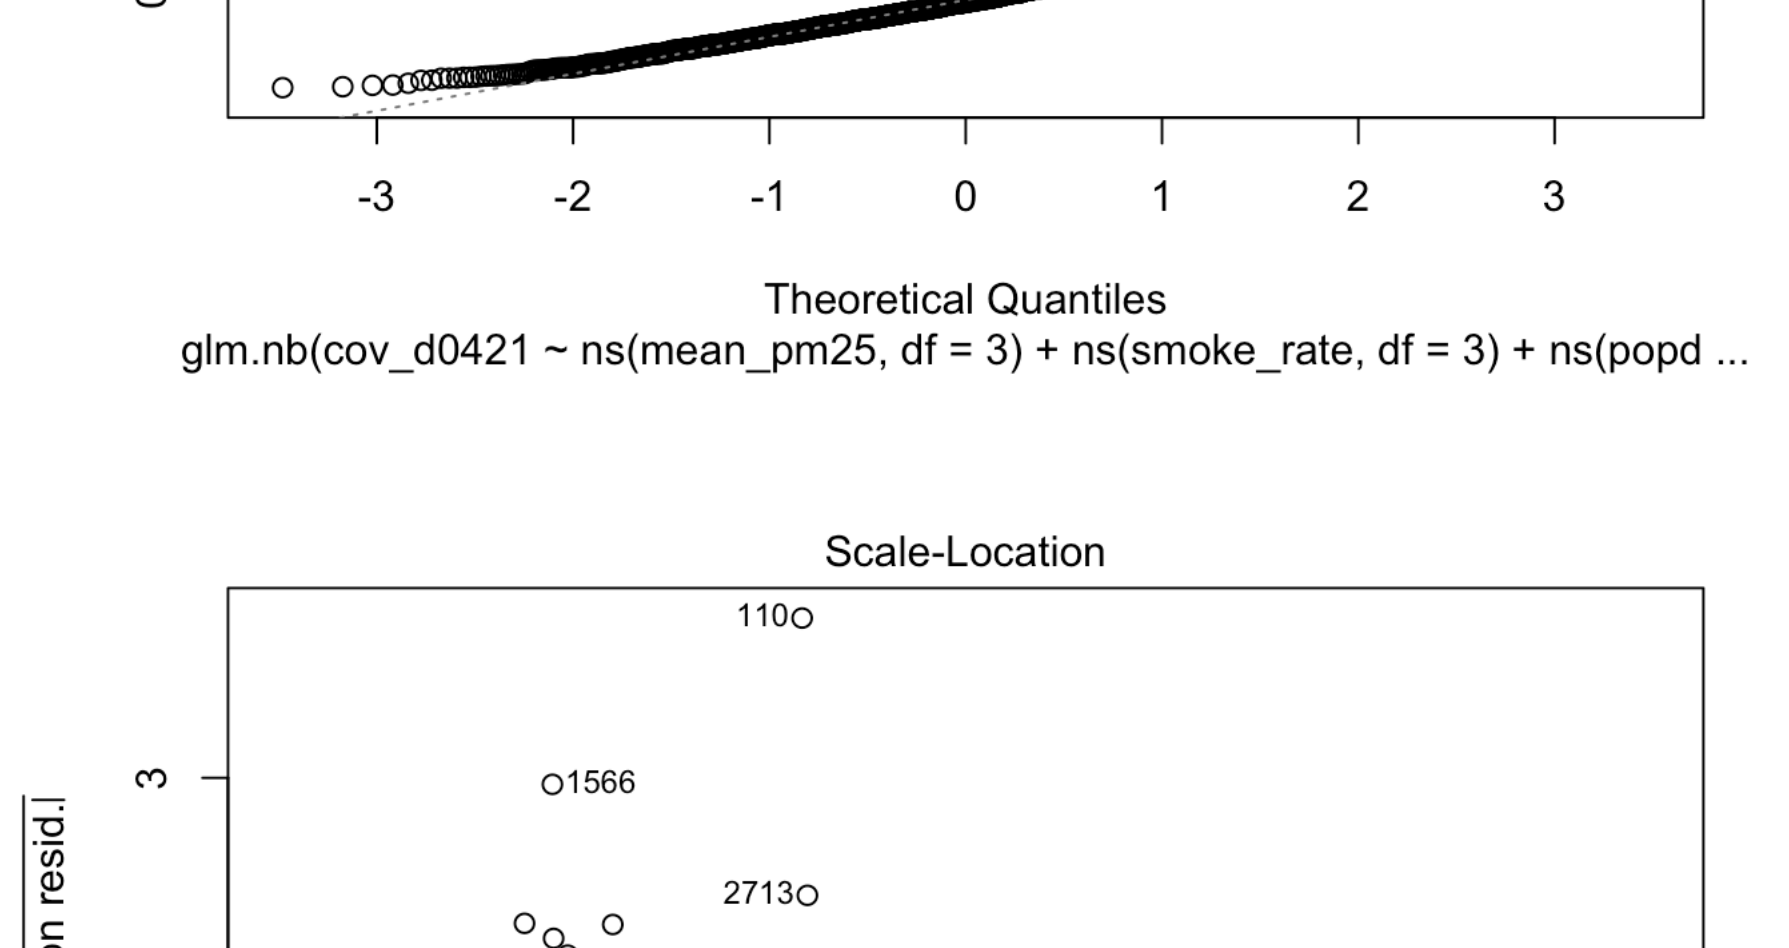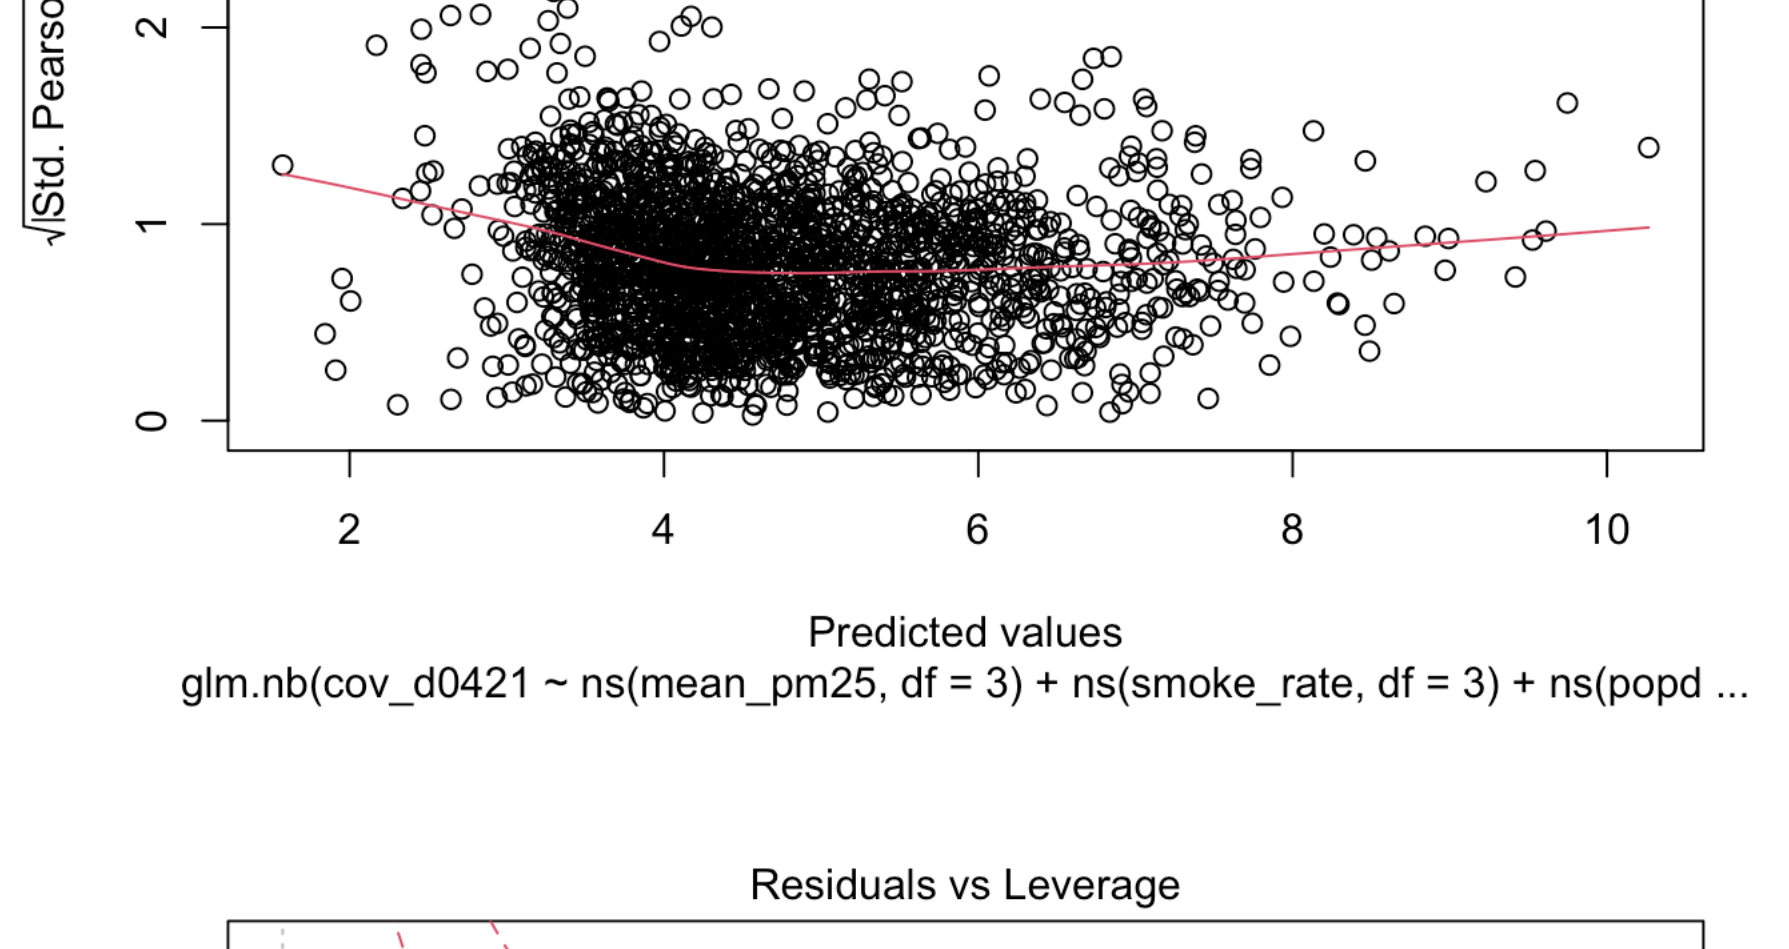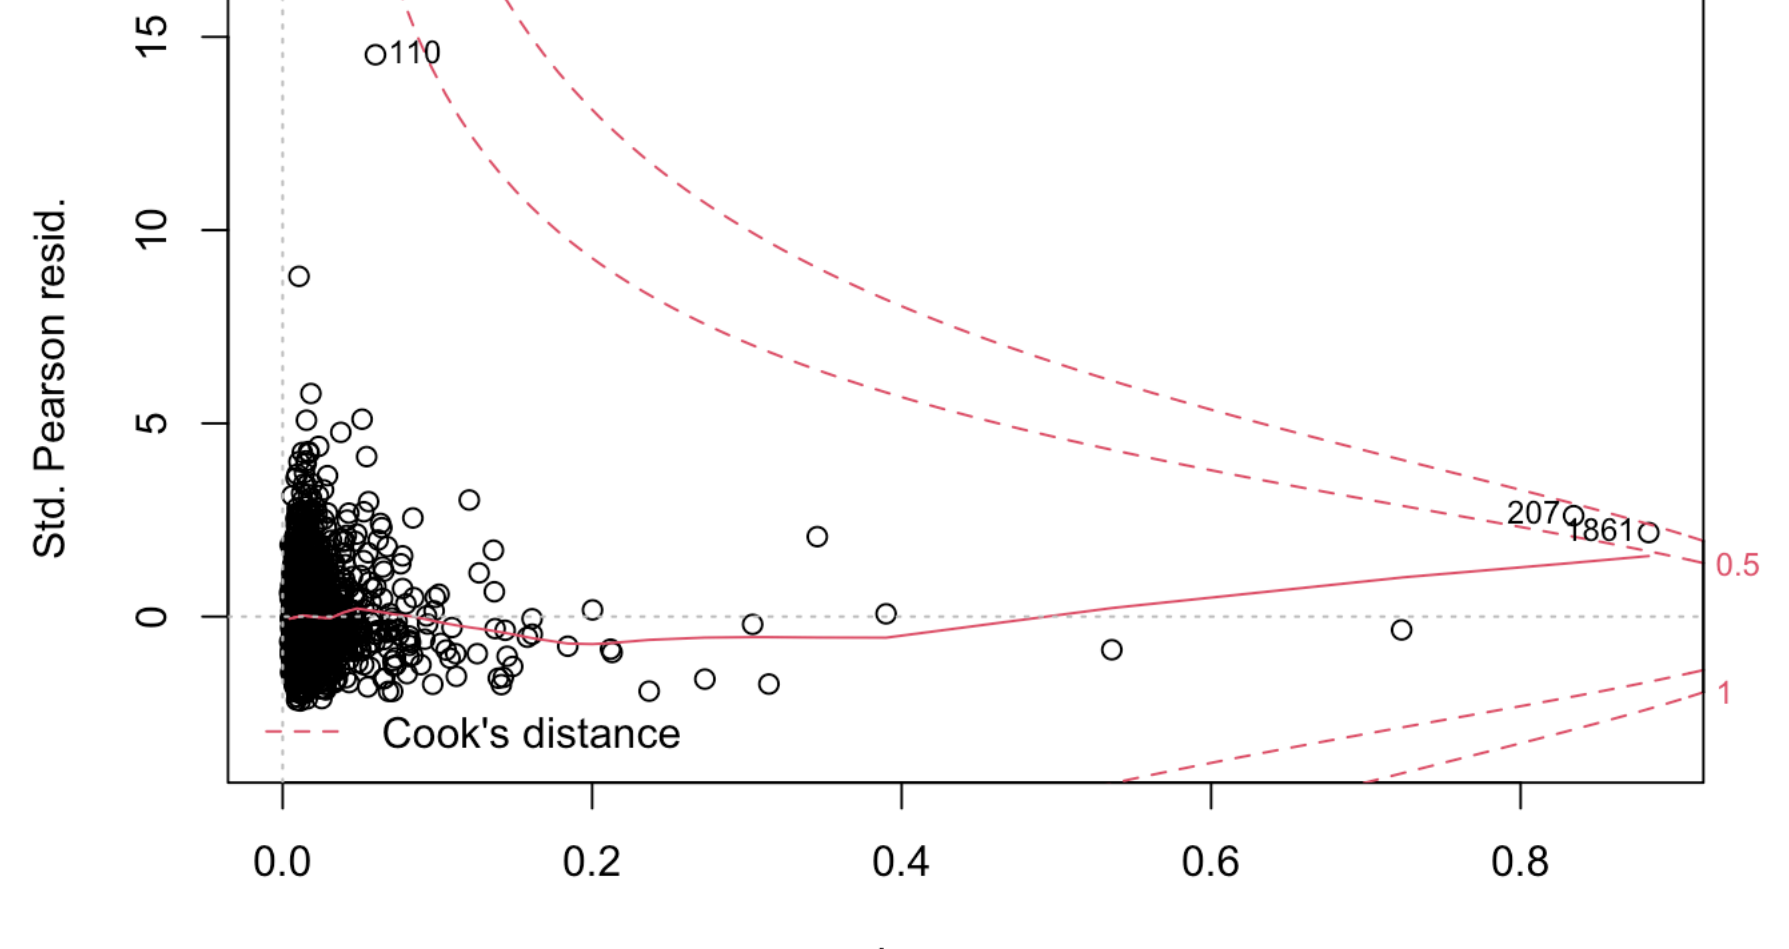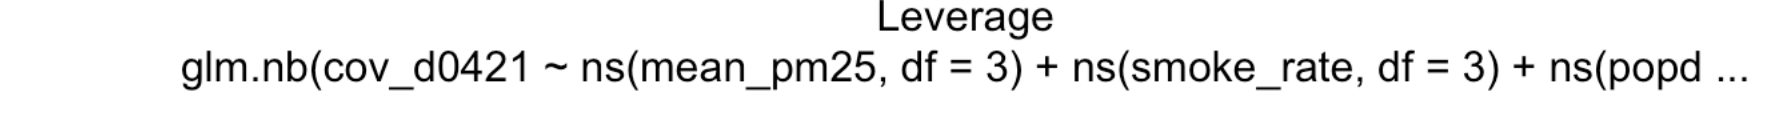

Supplement: ee9-6-e195-s001.pdf [file ee9-6-e195-s001.pdf]
